# Supplementary material
Source: MDPI journal article supplement (https://www.mdpi.com/2311-5637/8/12/754)
Supplement: s1 [file s1]

# Analysis of microbial community structure and volatile metabolites of JIUYAO in Fangxian, China

Wendi Zhang <sup>1,†</sup>, Qing Ren <sup>1,†,\*</sup>, Zhongchao Wang <sup>2</sup>, Huijie Liu <sup>2</sup>, Mingquan Huang <sup>1,\*</sup>, Jihong Wu <sup>1</sup> and Baoguo Sun <sup>1</sup>

- <sup>1</sup> Key Laboratory of Brewing Molecular Engineering of China Light Industry, Beijing Technology & Business University (BTBU), Beijing 100048, China; [15811204457@163.com](mailto:15811204457@163.com) (W.Z.); [wujihong12@126.com](mailto:wujihong12@126.com) (J.W.); [sunbg@btbu.edu.cn](mailto:sunbg@btbu.edu.cn) (B.S.)
- <sup>2</sup> Beijing Zhonghe Fangxian Bio-Food Co. LTD, Shiyan 442199, China; [wcz\\_zh@163.com](mailto:wcz_zh@163.com) (Z.W.); [591721577@qq.com](mailto:591721577@qq.com) (H.L.)
- \* Correspondence: [renqing@th.btbu.edu.cn](mailto:renqing@th.btbu.edu.cn) (Q.R.); [huangmq@th.btbu.edu.cn](mailto:huangmq@th.btbu.edu.cn) (M.H.)

**Abstract:** JIUYAO is an important saccharification starter in the production of Huangjiu, and also an important source of flavor. In this study, the microbial community structure of JIUYAO from Fangxian was studied by high-throughput sequencing (HTS) technology for the first time. The volatile flavor compounds of JIUYAO's metabolites were also analyzed by headspace solid phase microextraction combined with full two-dimensional gas chromatography-mass spectrometry (HS-SPME-GC×GC/MS) for the first time. The results showed that there were 15 dominant bacterial genera, including *Weissella*, *Pediococcus*, *unclassified\_k\_norank\_d\_Bacteria*, *Lactobacillus* and *Leuconostoc*, etc. Thirteen species of dominant fungi were *Wickerhamomyces*, *Saccharomycopsis*, *Rhizopus*, etc. The different samples of JIUYAO were similar in microbial species, but the number of species was significantly different. A total of 191 volatile flavor compounds (VFCs) were detected, among which esters, alcohols, acids and alkenes were the main flavor compounds, and 21 terpenoids were also detected. In addition, the functional prediction of microorganisms in JIUYAO revealed that global and overview maps, amino acid metabolism and carbohydrate metabolism were dominant. Through correlation analysis, 538 potential correlations between dominant microorganisms and different flavor compounds were obtained. This study revealed the interactions between microorganisms and volatile metabolites in JIUYAO, which provided reliable data for the analysis of microbial community structure of Fangxian JIUYAO, and provide theoretical support for the quality evaluation of JIUYAO.

**Keywords:** JIUYAO, Microbial community structure, Volatile flavor compound, Correlation analysis, Microbial metabolic

**Citation:** To be added by editorial staff during production.

Academic Editor: Firstname  
Lastname

Received: date  
Accepted: date  
Published: date

**Publisher's Note:** MDPI stays neutral with regard to jurisdictional claims in published maps and institutional affiliations.

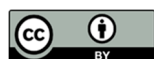

**Copyright:** © 2022 by the authors. Submitted for possible open access publication under the terms and conditions of the Creative Commons Attribution (CC BY) license (<https://creativecommons.org/licenses/by/4.0/>).

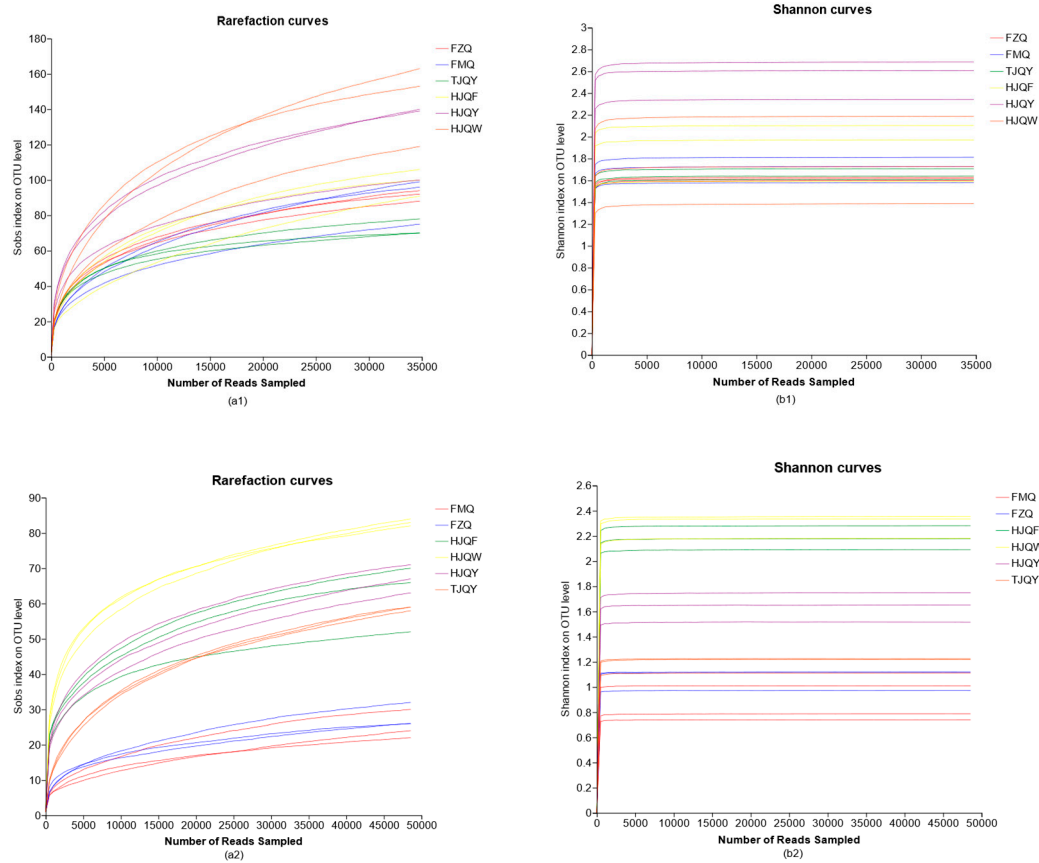

**Figure S1.** Dilution curves of  $\alpha$ -diversity index (a1: sobs diversity index of bacterial, a2: sobs diversity index of fungi, b1: Shannon diversity index of bacterial, b2: Shannon diversity index of fungi)

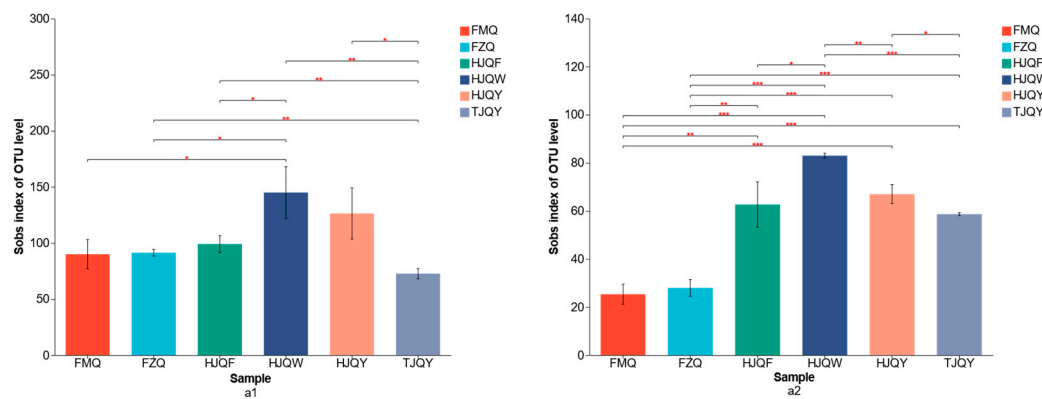

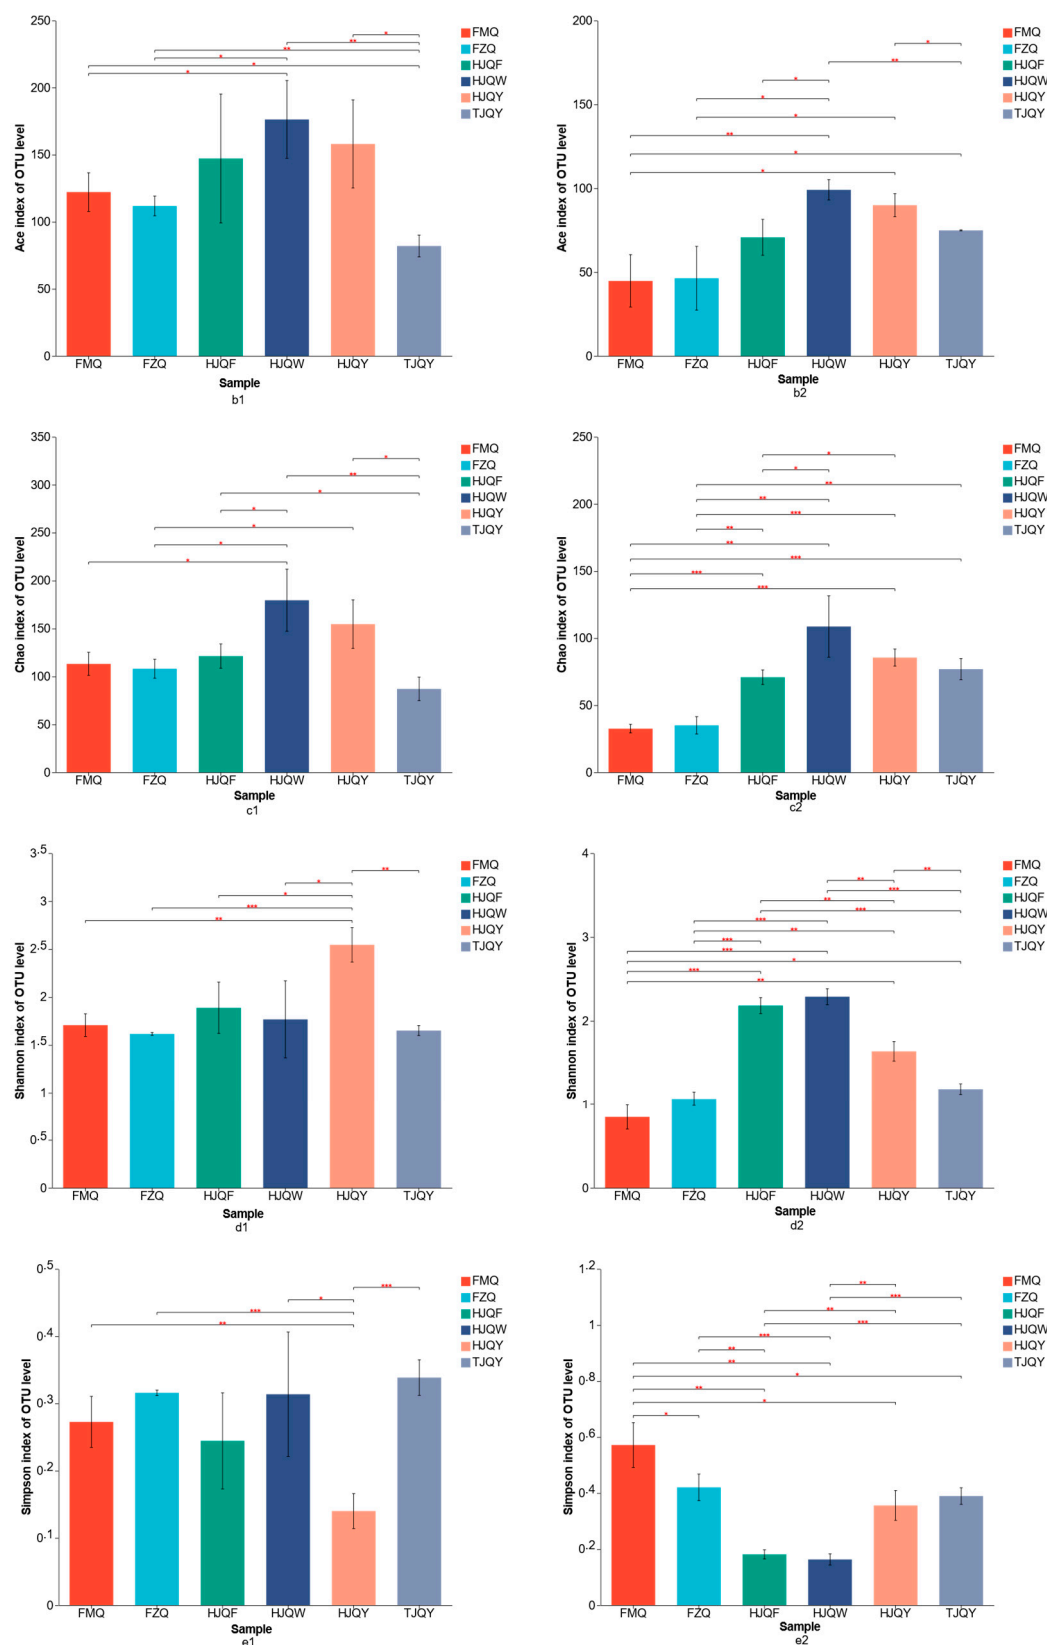

Note: \* means significant difference between samples ( $P < 0.05$ ), \*\* means extremely significant difference between samples ( $P < 0.01$ ), \*\*\* means extremely significant difference between samples ( $P < 0.001$ ).

**Figure S2.** Distributions of alpha diversity indices(a1: sobs diversity index of bacterial, a2: sobs diversity index of fungi, b1: ace diversity index of bacterial, b2: ace diversity index of fungi, c1: Chao diversity index of bacterial, c2: Chao diversity index of fungi, d1: Shannon diversity index of bacterial, d2: Shannon diversity index of fungi, e1: Simpson diversity index of bacterial, e2: Simpson diversity index of fungi.)

**Table S1.** Contents of volatile flavor compounds in six JIUYAO

| num<br>ber | Volatile flavor compound                    | RI   | NIST<br>RI | Contents (μg/kg)           |                            |                             |                             |                            |                             |
|------------|---------------------------------------------|------|------------|----------------------------|----------------------------|-----------------------------|-----------------------------|----------------------------|-----------------------------|
|            |                                             |      |            | TJQY                       | HJQF                       | HJQW                        | HJQY                        | FMQ                        | FZQ                         |
| 1          | Ethyl Acetate                               | 861  | 888        | 273.39±23.31 <sup>b</sup>  | 380.38±30.98 <sup>c</sup>  | 303.70±27.88 <sup>b</sup>   | 38.93±3.89 <sup>a</sup>     | 526.24±25.29 <sup>d</sup>  | 815.59±74.32 <sup>c</sup>   |
| 2          | Propanoic acid ethyl ester                  | 932  | 953        | ND                         | 84.95±2.40 <sup>c</sup>    | ND                          | 115.04±9.74 <sup>d</sup>    | 41.51±2.78 <sup>a</sup>    | 60.65±6.34 <sup>b</sup>     |
| 3          | 2-Methyl-propanoic acid ethyl ester         | 939  | 961        | ND                         | 54.92±3.32 <sup>b</sup>    | ND                          | 205.16±14.79 <sup>c</sup>   | ND                         | 18.89±1.92 <sup>a</sup>     |
| 4          | Acetic acid, 2-methyl-propyl ester          | 992  | 1012       | 9.07±1.00 <sup>a</sup>     | 8.83±0.70 <sup>a</sup>     | 9.03±0.98 <sup>a</sup>      | ND                          | 23.93±1.55 <sup>b</sup>    | 35.66±2.43 <sup>c</sup>     |
| 5          | Butanoic acid ethyl ester                   | 1014 | 1035       | 23.45±2.06 <sup>a</sup>    | 233.10±12.39 <sup>d</sup>  | 22.79±1.48 <sup>a</sup>     | 72.07±5.22 <sup>b</sup>     | 163.64±7.01 <sup>c</sup>   | 164.94±18.89 <sup>c</sup>   |
| 6          | 2-Methyl-butanoic acid ethyl ester          | 1030 | 1051       | 36.40±1.18 <sup>c</sup>    | 83.11±6.70 <sup>d</sup>    | 6.65±0.66 <sup>a</sup>      | 218.90±15.72 <sup>c</sup>   | 35.15±1.40 <sup>bc</sup>   | 23.21±1.76 <sup>b</sup>     |
| 7          | 3-Methyl-butanoic acid ethyl ester          | 1045 | 1068       | 10.86±1.04 <sup>b</sup>    | 50.06±4.27 <sup>d</sup>    | 2.68±0.27 <sup>a</sup>      | 48.44±4.59 <sup>d</sup>     | 14.48±0.37 <sup>bc</sup>   | 19.25±2.29 <sup>c</sup>     |
| 8          | Acetic acid butyl ester                     | 1049 | 1074       | ND                         | ND                         | 6.33±0.55 <sup>b</sup>      | 2.06±0.23 <sup>a</sup>      | 12.83±1.3 <sup>c</sup>     | 28.72±1.55 <sup>d</sup>     |
| 9          | 3-Methyl-1-butanol acetate                  | 1102 | 1122       | ND                         | 167.81±13.19 <sup>b</sup>  | 149.88±13.12 <sup>b</sup>   | 95.58±9.18 <sup>a</sup>     | 496.92±20.22 <sup>c</sup>  | 677.81±62.2 <sup>d</sup>    |
| 10         | Pentanoic acid ethyl ester                  | 1114 | 1134       | 224.45±7.08 <sup>a</sup>   | 395.12±21.40 <sup>b</sup>  | 209.69±19.89 <sup>a</sup>   | 478.63±34.60 <sup>c</sup>   | 462.52±32.19 <sup>c</sup>  | 239.63±15.44 <sup>a</sup>   |
| 11         | Acetic acid pentyl ester                    | 1152 | 1176       | ND                         | ND                         | ND                          | ND                          | 10.29±0.95 <sup>a</sup>    | 16.93±1.67 <sup>b</sup>     |
| 12         | 4-Methyl-pentanoic acid ethyl ester         | 1170 | 1190       | 1.79±0.08 <sup>a</sup>     | 5.36±0.30 <sup>c</sup>     | 2.27±0.20 <sup>a</sup>      | 3.19±0.27 <sup>b</sup>      | 14.76±0.48 <sup>c</sup>    | 9.57±0.83 <sup>d</sup>      |
| 13         | Hexanoic acid ethyl ester                   | 1216 | 1233       | 1427.66±56.98 <sup>b</sup> | 1921.53±97.90 <sup>c</sup> | 1147.49±104.42 <sup>a</sup> | 2170.86±156.84 <sup>d</sup> | 3187.42±61.79 <sup>c</sup> | 2152.92±204.47 <sup>d</sup> |
| 14         | 2-Oxo-propanoic acid ethyl ester            | 1248 | 1253       | ND                         | ND                         | 0.38±0.04 <sup>a</sup>      | ND                          | ND                         | ND                          |
| 15         | Acetic acid hexyl ester                     | 1251 | 1272       | 2.59±0.41 <sup>a</sup>     | 8.66±0.47 <sup>c</sup>     | 4.57±0.43 <sup>b</sup>      | 4.07±0.46 <sup>b</sup>      | 9.38±0.48 <sup>c</sup>     | 14.08±0.23 <sup>d</sup>     |
| 16         | 2-methyl-Butanoic acid 2-methyl-butyl ester | 1277 | 1284       | ND                         | 1.86±0.13 <sup>a</sup>     | ND                          | ND                          | ND                         | ND                          |
| 17         | Hexanoic acid, 2-methylpropyl ester         | 1304 | 1350       | ND                         | ND                         | ND                          | ND                          | ND                         | 0.34±0.03 <sup>a</sup>      |
| 18         | Heptanoic acid, ethyl ester                 | 1314 | 1331       | 183.90±1.28 <sup>a</sup>   | 233.78±7.65 <sup>b</sup>   | 181.66±18.75 <sup>a</sup>   | 250.97±16.56 <sup>b</sup>   | 527.85±16.76 <sup>d</sup>  | 279.48±18.95 <sup>c</sup>   |
| 19         | (L)-Ethyl Lactate                           | 1318 | 1349       | 17.48±2.86 <sup>c</sup>    | 3.55±0.18 <sup>a</sup>     | 3.90±0.39 <sup>a</sup>      | 12.13±1.20 <sup>b</sup>     | 26.66±0.12 <sup>d</sup>    | 26.82±1.26 <sup>d</sup>     |
| 20         | Acetic acid heptyl ester                    | 1352 | 1377       | 0.21±0.01 <sup>a</sup>     | ND                         | ND                          | ND                          | ND                         | 0.54±0.07 <sup>b</sup>      |
| 21         | Octanoic acid ethyl ester                   | 1414 | 1435       | 168.31±8.00 <sup>a</sup>   | 271.32±8.94 <sup>c</sup>   | 213.37±17.59 <sup>b</sup>   | 269.45±18.07 <sup>c</sup>   | 674.68±21.99 <sup>c</sup>  | 357.84±27.88 <sup>d</sup>   |
| 22         | Nonanoic acid ethyl ester                   | 1514 | 1531       | 367.87±37.88 <sup>c</sup>  | 93.83±2.56 <sup>a</sup>    | 89.21±8.10 <sup>a</sup>     | 124.39±10.17 <sup>a</sup>   | 467.29±13.40 <sup>d</sup>  | 214.49±22.34 <sup>b</sup>   |
| 23         | 2-Octenoic acid ethyl ester                 | 1529 | 1557       | 1.26±0.18 <sup>b</sup>     | 0.59±0.07 <sup>a</sup>     | ND                          | 3.86±0.40 <sup>c</sup>      | ND                         | ND                          |

| num<br>ber | Volatile flavor compound        | RI   | NIST<br>RI | Contents (μg/kg)        |                          |                         |                          |                          |                           |
|------------|---------------------------------|------|------------|-------------------------|--------------------------|-------------------------|--------------------------|--------------------------|---------------------------|
|            |                                 |      |            | TJQY                    | HJQF                     | HJQW                    | HJQY                     | FMQ                      | FZQ                       |
| 24         | Bornyl acetate                  | 1551 | 1581       | 12.44±1.09 <sup>a</sup> | ND                       | ND                      | ND                       | ND                       | 84.52±7.08 <sup>b</sup>   |
| 25         | Decanoic acid ethyl ester       | 1615 | 1638       | 22.87±2.35 <sup>c</sup> | 16.60±1.21 <sup>b</sup>  | 9.85±0.93 <sup>a</sup>  | 19.46±0.68 <sup>bc</sup> | 42.38±1.93 <sup>e</sup>  | 34.00±3.23 <sup>d</sup>   |
| 26         | Ethyl benzoate                  | 1633 | 1660       | 13.20±0.89 <sup>c</sup> | 0.97±0.08 <sup>a</sup>   | 3.87±0.58 <sup>b</sup>  | 5.25±0.19 <sup>b</sup>   | 19.96±1.97 <sup>d</sup>  | 18.30±0.72 <sup>d</sup>   |
| 27         | Butanedioic acid diethyl ester  | 1650 | 1680       | 0.93±0.11 <sup>a</sup>  | 3.72±0.33 <sup>b</sup>   | 4.85±0.60 <sup>b</sup>  | 25.31±1.58 <sup>c</sup>  | ND                       | ND                        |
| 28         | Undecanoic acid ethyl ester     | 1720 | 1739       | 0.50±0.05 <sup>b</sup>  | 0.28±0.03 <sup>a</sup>   | 0.31±0.02 <sup>a</sup>  | 0.42±0.05 <sup>ab</sup>  | 1.41±0.02 <sup>c</sup>   | 1.26±0.20 <sup>c</sup>    |
| 29         | n-Propyl benzoate               | 1726 | 1765       | 2.19±0.13 <sup>b</sup>  | ND                       | 0.66±0.10 <sup>a</sup>  | 0.57±0.07 <sup>a</sup>   | 2.42±0.35 <sup>b</sup>   | 2.92±0.10 <sup>c</sup>    |
| 30         | 2-Hydroxy-benzoicacimethylester | 1743 | 1765       | 1.25±0.11 <sup>bc</sup> | 0.73±0.09 <sup>a</sup>   | 1.05±0.08 <sup>b</sup>  | 1.25±0.16 <sup>bc</sup>  | 1.49±0.17 <sup>c</sup>   | 2.84±0.18 <sup>d</sup>    |
| 31         | Benzeneacetic acid ethyl ester  | 1760 | 1783       | 26.00±2.14 <sup>c</sup> | 22.28±1.27 <sup>bc</sup> | 11.37±1.04 <sup>a</sup> | 103.16±9.19 <sup>c</sup> | 60.66±1.42 <sup>d</sup>  | 17.24±1.69 <sup>ab</sup>  |
| 32         | Acetic acid 2-phenylethyl ester | 1788 | 1813       | ND                      | 6.26±0.61 <sup>c</sup>   | 0.98±0.11 <sup>a</sup>  | 3.72±0.44 <sup>b</sup>   | ND                       | 4.08±0.26 <sup>b</sup>    |
| 33         | Dodecanoic acid ethyl ester     | 1824 | 1841       | 21.77±2.79 <sup>d</sup> | 7.49±0.59 <sup>a</sup>   | 11.53±1.04 <sup>b</sup> | 16.54±1.07 <sup>c</sup>  | 23.73±2.18 <sup>d</sup>  | 17.00±1.60 <sup>c</sup>   |
| 34         | Butyl benzoate                  | 1836 | 1871       | 0.36±0.03 <sup>a</sup>  | ND                       | ND                      | ND                       | ND                       | 1.19±0.03 <sup>b</sup>    |
| 35         | Tetradecanoic acid ethyl ester  | 2031 | 2049       | 9.99±1.28 <sup>c</sup>  | 3.72±0.42 <sup>b</sup>   | 3.19±0.34 <sup>ab</sup> | 5.26±0.39 <sup>c</sup>   | 3.03±0.49 <sup>ab</sup>  | 2.19±0.23 <sup>a</sup>    |
| 36         | Hexadecanoic acid ethyl ester   | 2232 | 2251       | 14.74±1.51 <sup>d</sup> | 3.81±0.55 <sup>a</sup>   | 8.91±0.87 <sup>c</sup>  | 7.19±0.41 <sup>b</sup>   | 3.94±0.55 <sup>a</sup>   | 3.45±0.52 <sup>a</sup>    |
| 37         | 2-Butanol                       | 998  | 1025       | ND                      | ND                       | ND                      | ND                       | 5.77±0.50 <sup>a</sup>   | 13.98±1.25 <sup>b</sup>   |
| 38         | 1-Propanol                      | 1014 | 1035       | ND                      | ND                       | ND                      | ND                       | ND                       | 7.73±0.76 <sup>a</sup>    |
| 39         | 2-Methyl-1-propanol             | 1064 | 1092       | 6.05±0.39 <sup>a</sup>  | 15.00±1.46 <sup>c</sup>  | 12.52±1.09 <sup>b</sup> | 12.21±0.74 <sup>b</sup>  | 15.57±0.61 <sup>c</sup>  | 25.14±2.57 <sup>d</sup>   |
| 40         | 2-Pentanol                      | 1094 | 1119       | ND                      | ND                       | ND                      | ND                       | 18.27±1.23 <sup>a</sup>  | 26.62±2.32 <sup>b</sup>   |
| 41         | 1-Butanol                       | 1116 | 1142       | 2.33±0.25 <sup>a</sup>  | 5.40±0.35 <sup>b</sup>   | 6.39±0.66 <sup>b</sup>  | 5.84±0.57 <sup>b</sup>   | 18.74±0.25 <sup>c</sup>  | 29.41±2.38 <sup>d</sup>   |
| 42         | 1-Penten-3-ol                   | 1131 | 1159       | ND                      | 0.95±0.06 <sup>b</sup>   | ND                      | 0.51±0.06 <sup>a</sup>   | 1.58±0.22 <sup>c</sup>   | 2.31±0.13 <sup>d</sup>    |
| 43         | 3-Methyl-1-butanol              | 1180 | 1209       | 38.61±2.88 <sup>a</sup> | 109.80±7.95 <sup>c</sup> | 63.12±6.22 <sup>b</sup> | 46.71±4.21 <sup>ab</sup> | 196.76±2.78 <sup>d</sup> | 357.99±20.45 <sup>c</sup> |
| 44         | 1,8-Cineole                     | 1185 | 1213       | 2.38±0.30 <sup>a</sup>  | ND                       | 5.43±0.54 <sup>a</sup>  | 18.67±1.58 <sup>b</sup>  | 3.11±0.12 <sup>a</sup>   | 98.01±10.22 <sup>c</sup>  |
| 45         | 2-Hexanol                       | 1195 | 1220       | ND                      | 1.01±0.07 <sup>b</sup>   | ND                      | 0.76±0.07 <sup>a</sup>   | 3.44±0.08 <sup>c</sup>   | 6.35±0.15 <sup>d</sup>    |
| 46         | 1-Pentanol                      | 1223 | 1250       | 33.33±0.63 <sup>a</sup> | 82.75±4.47 <sup>d</sup>  | 45.09±3.36 <sup>b</sup> | 66.25±4.62 <sup>c</sup>  | 59.44±2.24 <sup>c</sup>  | 97.31±7.39 <sup>c</sup>   |
| 47         | 2-Heptanol                      | 1293 | 1320       | 1.65±0.01 <sup>a</sup>  | 2.91±0.28 <sup>b</sup>   | 1.90±0.27 <sup>a</sup>  | 2.91±0.28 <sup>b</sup>   | 7.56±0.25 <sup>c</sup>   | 8.82±0.82 <sup>d</sup>    |
| 48         | 3-Heptanol                      | 1268 | 1290       | 0.76±0.07 <sup>b</sup>  | 0.38±0.03 <sup>a</sup>   | 0.34±0.03 <sup>a</sup>  | 0.29±0.02 <sup>a</sup>   | 0.63±0.10 <sup>b</sup>   | 0.93±0.13 <sup>c</sup>    |

| num<br>ber | Volatile flavor compound       | RI   | NIST<br>RI | Contents (μg/kg)           |                            |                            |                           |                           |                           |
|------------|--------------------------------|------|------------|----------------------------|----------------------------|----------------------------|---------------------------|---------------------------|---------------------------|
|            |                                |      |            | TJQY                       | HJQF                       | HJQW                       | HJQY                      | FMQ                       | FZQ                       |
| 49         | 3-Methyl-1-pentanol            | 1301 | 1325       | ND                         | 0.25±0.02 <sup>a</sup>     | ND                         | ND                        | ND                        | 0.45±0.07 <sup>b</sup>    |
| 50         | 1-Hexanol                      | 1325 | 1355       | 145.74±8.26 <sup>bc</sup>  | 134.07±4.80 <sup>b</sup>   | 82.10±8.53 <sup>a</sup>    | 171.04±8.43 <sup>c</sup>  | 306.24±8.27 <sup>d</sup>  | 424.89±42.06 <sup>e</sup> |
| 51         | (Z)-3-Hexen-1-ol               | 1357 | 1382       | ND                         | ND                         | 0.14±0.02 <sup>a</sup>     | ND                        | 0.98±0.06 <sup>b</sup>    | 1.25±0.10 <sup>c</sup>    |
| 52         | 3-Octanol                      | 1369 | 1393       | 2.25±0.14 <sup>b</sup>     | 1.93±0.14 <sup>ab</sup>    | ND                         | 1.69±0.12 <sup>a</sup>    | 4.02±0.09 <sup>c</sup>    | 4.48±0.36 <sup>d</sup>    |
| 53         | 1-Octen-3-ol                   | 1425 | 1450       | 88.97±3.46 <sup>c</sup>    | 89.53±4.68 <sup>c</sup>    | 67.14±6.02 <sup>b</sup>    | 79.42±7.77 <sup>c</sup>   | 49.36±0.60 <sup>a</sup>   | 101.11±9.31 <sup>d</sup>  |
| 54         | 2-Ethylhexanol                 | 1464 | 1491       | 9.66±0.57 <sup>a</sup>     | 13.48±1.16 <sup>ab</sup>   | 20.90±2.23 <sup>b</sup>    | ND                        | 101.37±0.73 <sup>c</sup>  | 134.00±11.83 <sup>d</sup> |
| 55         | 2,3-Butanediol                 | 1510 | 1543       | 1006.08±77.17 <sup>d</sup> | 440.93±15.61 <sup>ab</sup> | 453.94±35.24 <sup>ab</sup> | 581.72±25.29 <sup>c</sup> | 398.81±5.62 <sup>a</sup>  | 488.59±41.34 <sup>b</sup> |
| 56         | 3,7-dimethyl-1,6-Octadien-3-ol | 1523 | 1547       | 6.53±0.19 <sup>c</sup>     | 2.45±0.09 <sup>c</sup>     | 1.08±0.07 <sup>a</sup>     | 1.62±0.18 <sup>b</sup>    | 1.59±0.06 <sup>b</sup>    | 4.32±0.46 <sup>d</sup>    |
| 57         | 1-Octanol                      | 1528 | 1557       | 23.82±0.91 <sup>c</sup>    | 13.81±0.47 <sup>a</sup>    | 15.24±1.38 <sup>a</sup>    | 18.41±1.86 <sup>b</sup>   | 47.06±0.79 <sup>d</sup>   | 45.39±2.26 <sup>d</sup>   |
| 58         | Fenchyl Alcohol                | 1553 | 1582       | ND                         | 0.64±0.07 <sup>a</sup>     | ND                         | ND                        | 2.59±0.37 <sup>b</sup>    | 6.05±0.56 <sup>c</sup>    |
| 59         | Propylene Glycol               | 1558 | 1600       | ND                         | ND                         | ND                         | ND                        | 35.74±1.59 <sup>b</sup>   | 24.21±2.24 <sup>a</sup>   |
| 60         | Terpinen-4-ol                  | 1571 | 1602       | 3.22±0.27 <sup>bc</sup>    | 1.85±0.10 <sup>ab</sup>    | 4.77±0.48 <sup>cd</sup>    | 5.56±0.49 <sup>d</sup>    | 0.78±0.15 <sup>a</sup>    | 25.93±2.14 <sup>c</sup>   |
| 61         | (E)-2-Octen-1-ol               | 1583 | 1614       | 7.37±0.43 <sup>bc</sup>    | 2.93±0.35 <sup>a</sup>     | 3.10±0.44 <sup>a</sup>     | 4.12±0.36 <sup>a</sup>    | 8.60±1.63 <sup>c</sup>    | 6.92±0.21 <sup>b</sup>    |
| 62         | 1-Nonanol                      | 1631 | 1660       | 20.90±1.19 <sup>c</sup>    | 8.00±0.72 <sup>a</sup>     | 13.02±1.86 <sup>b</sup>    | 15.21±0.71 <sup>b</sup>   | 34.56±0.34 <sup>d</sup>   | 49.58±3.57 <sup>e</sup>   |
| 63         | Isoborneol                     | 1633 | 1660       | ND                         | 0.17±0.02 <sup>a</sup>     | ND                         | ND                        | 0.55±0.05 <sup>b</sup>    | 2.94±0.10 <sup>c</sup>    |
| 64         | 2-Borneol                      | 1666 | 1702       | ND                         | ND                         | ND                         | ND                        | ND                        | 156.93±11.33 <sup>a</sup> |
| 65         | 2-Nonen-1-ol                   | 1685 | 1692       | 1.42±0.10 <sup>c</sup>     | 0.18±0.02 <sup>a</sup>     | ND                         | 0.79±0.08 <sup>b</sup>    | 2.16±0.16 <sup>d</sup>    | 3.54±0.27 <sup>e</sup>    |
| 66         | 2-Undecanol                    | 1693 | 1717       | 0.76±0.05 <sup>a</sup>     | ND                         | ND                         | ND                        | ND                        | 4.66±0.37 <sup>b</sup>    |
| 67         | 1-Decanol                      | 1736 | 1760       | 1.06±0.15 <sup>a</sup>     | ND                         | ND                         | ND                        | 3.41±0.10 <sup>b</sup>    | 5.37±0.50 <sup>c</sup>    |
| 68         | Benzyl alcohol                 | 1848 | 1870       | 13.82±1.29 <sup>b</sup>    | 8.88±0.53 <sup>a</sup>     | 9.31±0.95 <sup>a</sup>     | 24.63±1.66 <sup>c</sup>   | 35.10±1.71 <sup>d</sup>   | 27.39±1.66 <sup>c</sup>   |
| 69         | Phenylethyl Alcohol            | 1877 | 1906       | 263.00±24.54 <sup>b</sup>  | 729.64±35.77 <sup>c</sup>  | 309.71±30.43 <sup>c</sup>  | 409.37±26.36 <sup>d</sup> | 242.11±1.41 <sup>b</sup>  | 142.89±7.76 <sup>a</sup>  |
| 70         | 1-Dodecanol                    | 1938 | 1966       | 1.11±0.10 <sup>a</sup>     | ND                         | 1.08±0.13 <sup>a</sup>     | ND                        | 1.00±0.09 <sup>a</sup>    | 1.15±0.16 <sup>a</sup>    |
| 71         | 2-Oxo-propanoic acid           | 1248 | 1253       | ND                         | ND                         | ND                         | 0.19±0.03 <sup>a</sup>    | ND                        | ND                        |
| 72         | Acetic acid                    | 1425 | 1450       | 95.01±6.17 <sup>c</sup>    | 187.31±3.84 <sup>b</sup>   | 80.77±8.17                 | 189.77±4.82 <sup>a</sup>  | 100.37±2.48 <sup>c</sup>  | 121.88±8.10 <sup>b</sup>  |
| 73         | Formic acid                    | 1488 | 1503       | 0.31±0.05 <sup>a</sup>     | ND                         | ND                         | ND                        | 238.22±11.99 <sup>b</sup> | 488.59±41.34 <sup>c</sup> |

| num<br>ber | Volatile flavor compound | RI   | NIST<br>RI | Contents (μg/kg)         |                           |                          |                           |                          |                           |
|------------|--------------------------|------|------------|--------------------------|---------------------------|--------------------------|---------------------------|--------------------------|---------------------------|
|            |                          |      |            | TJQY                     | HJQF                      | HJQW                     | HJQY                      | FMQ                      | FZQ                       |
| 74         | 2-Methyl-propanoic acid  | 1540 | 1570       | 14.36±1.06 <sup>c</sup>  | 23.90±2.44 <sup>d</sup>   | 10.18±1.07 <sup>b</sup>  | 38.87±2.34 <sup>c</sup>   | 6.70±0.16 <sup>a</sup>   | 9.51±1.01 <sup>b</sup>    |
| 75         | Butanoic acid            | 1598 | 1625       | 10.28±0.76 <sup>b</sup>  | 33.34±2.45 <sup>d</sup>   | 4.43±0.63 <sup>a</sup>   | 8.06±0.79 <sup>b</sup>    | 22.50±1.02 <sup>c</sup>  | 20.18±1.45 <sup>c</sup>   |
| 76         | 3-methyl-Butanoic acid   | 1641 | 1666       | 27.39±1.66 <sup>b</sup>  | 118.32±10.05 <sup>c</sup> | 14.20±1.02 <sup>a</sup>  | 39.66±3.80 <sup>b</sup>   | 18.61±0.28 <sup>a</sup>  | 15.44±1.49 <sup>a</sup>   |
| 77         | Pentanoic acid           | 1708 | 1733       | 6.81±0.47 <sup>a</sup>   | 20.85±1.98 <sup>d</sup>   | 14.04±1.32 <sup>b</sup>  | 21.00±1.71 <sup>d</sup>   | 32.62±1.02 <sup>e</sup>  | 17.72±1.63 <sup>c</sup>   |
| 78         | 2-Methyl-pentanoic acid  | 1718 | 1764       | 5.40±0.19 <sup>a</sup>   | ND                        | 7.97±0.82 <sup>b</sup>   | 11.44±1.06 <sup>c</sup>   | 8.81±0.23 <sup>b</sup>   | ND                        |
| 79         | Hexanoic acid            | 1819 | 1846       | 89.61±2.02 <sup>bc</sup> | 81.29±6.86 <sup>b</sup>   | 47.60±4.64 <sup>a</sup>  | 100.96±12.69 <sup>c</sup> | 288.81±1.11 <sup>c</sup> | 175.14±16.55 <sup>d</sup> |
| 80         | Heptanoic acid           | 1923 | 1950       | 2.91±0.40 <sup>ab</sup>  | 3.53±0.08 <sup>b</sup>    | 2.06±0.28 <sup>a</sup>   | 5.65±0.34 <sup>c</sup>    | 13.03±1.19 <sup>c</sup>  | 6.81±0.75 <sup>d</sup>    |
| 81         | Octanoic acid            | 2029 | 2060       | 2.12±0.20 <sup>ab</sup>  | 2.00±0.17 <sup>ab</sup>   | 1.64±0.02 <sup>a</sup>   | 2.36±0.26 <sup>b</sup>    | 13.19±0.56 <sup>d</sup>  | 4.39±0.61 <sup>c</sup>    |
| 82         | Nonanoic acid            | 2133 | 2171       | 3.61±0.32 <sup>b</sup>   | ND                        | ND                       | ND                        | 4.57±0.19 <sup>c</sup>   | 3.14±0.33 <sup>a</sup>    |
| 83         | Hexanal                  | 1056 | 1083       | 96.92±8.32 <sup>c</sup>  | 137.86±9.26 <sup>c</sup>  | 110.81±6.00 <sup>d</sup> | 49.01±4.25 <sup>a</sup>   | 80.13±5.21 <sup>b</sup>  | 57.81±5.96 <sup>a</sup>   |
| 84         | (E)-2-Methyl-2-butenal   | 1068 | 1092       | ND                       | 2.81±0.24 <sup>d</sup>    | 2.14±0.20 <sup>c</sup>   | 3.61±0.24 <sup>c</sup>    | 1.07±0.20 <sup>a</sup>   | 1.50±0.13 <sup>b</sup>    |
| 85         | 3-Methyl-2-butenal       | 1172 | 1215       | ND                       | ND                        | 1.62±0.08 <sup>b</sup>   | 1.31±0.07 <sup>a</sup>    | 2.10±0.09 <sup>c</sup>   | 2.08±0.25 <sup>c</sup>    |
| 86         | (E)-2-Hexenal            | 1195 | 1220       | 1.47±0.09 <sup>a</sup>   | ND                        | ND                       | ND                        | ND                       | ND                        |
| 87         | Octanal                  | 1266 | 1289       | 15.60±1.89 <sup>d</sup>  | 9.97±0.98 <sup>c</sup>    | 10.58±0.15 <sup>c</sup>  | 4.60±0.45 <sup>a</sup>    | 8.16±0.77 <sup>b</sup>   | ND                        |
| 88         | (Z)-2-Heptenal           | 1296 | 1322       | ND                       | ND                        | 3.26±0.41 <sup>a</sup>   | ND                        | ND                       | 3.42±0.48 <sup>a</sup>    |
| 89         | Nonanal                  | 1369 | 1393       | 86.53±4.24 <sup>c</sup>  | 21.17±1.96 <sup>c</sup>   | 30.42±0.13 <sup>d</sup>  | 10.83±1.04 <sup>b</sup>   | 28.27±1.36 <sup>d</sup>  | 6.08±0.53 <sup>a</sup>    |
| 90         | (E)-2-Octenal            | 1401 | 1429       | 4.60±0.41 <sup>b</sup>   | 2.13±0.22 <sup>a</sup>    | ND                       | ND                        | 7.78±0.51 <sup>d</sup>   | 5.34±0.53 <sup>c</sup>    |
| 91         | Decyl aldehyde           | 1474 | 1498       | 4.70±0.20 <sup>c</sup>   | ND                        | 4.06±0.22 <sup>b</sup>   | ND                        | 4.66±0.46 <sup>c</sup>   | 1.85±0.10 <sup>a</sup>    |
| 92         | Benzaldehyde             | 1491 | 1520       | 17.51±1.22 <sup>a</sup>  | 65.94±5.57 <sup>c</sup>   | 55.82±4.66 <sup>d</sup>  | 29.88±2.56 <sup>b</sup>   | 41.41±0.55 <sup>c</sup>  | 61.97±5.24 <sup>dc</sup>  |
| 93         | 5-Methyl-2-furaldehyde   | 1543 | 1570       | ND                       | 3.16±0.38 <sup>b</sup>    | 5.04±0.55 <sup>c</sup>   | ND                        | ND                       | 1.53±0.14 <sup>a</sup>    |
| 94         | Hendecanaldehyde         | 1579 | 1604       | 0.29±0.03 <sup>b</sup>   | ND                        | 0.18±0.02 <sup>a</sup>   | ND                        | ND                       | ND                        |
| 95         | Benzeneacetaldehyde      | 1609 | 1640       | 1.65±0.15 <sup>a</sup>   | 13.22±0.48 <sup>c</sup>   | 4.13±0.56 <sup>b</sup>   | 4.41±0.42 <sup>b</sup>    | 1.47±0.23 <sup>a</sup>   | ND                        |
| 96         | (E)-2-Decenal            | 1612 | 1644       | 0.44±0.06 <sup>ab</sup>  | 0.40±0.02 <sup>a</sup>    | 0.57±0.10 <sup>bc</sup>  | ND                        | 0.68±0.13 <sup>c</sup>   | 0.71±0.09 <sup>c</sup>    |
| 97         | 2-Octenal, 2-butyl-      | 1639 | 1656       | 2.76±0.24 <sup>a</sup>   | 17.33±1.31 <sup>d</sup>   | 7.36±0.75 <sup>b</sup>   | 13.59±0.82 <sup>c</sup>   | 1.83±0.22 <sup>a</sup>   | 7.20±0.69 <sup>b</sup>    |
| 98         | 2-Hydroxy-benzaldehyde   | 1641 | 1666       | 1.51±0.14 <sup>a</sup>   | 2.81±0.18 <sup>c</sup>    | 3.07±0.43 <sup>c</sup>   | 2.30±0.26 <sup>b</sup>    | 1.82±0.25 <sup>ab</sup>  | 1.97±0.30 <sup>ab</sup>   |



| num<br>ber | Volatile flavor compound           | RI   | NIST<br>RI | Contents (μg/kg)        |                          |                         |                          |                          |                          |
|------------|------------------------------------|------|------------|-------------------------|--------------------------|-------------------------|--------------------------|--------------------------|--------------------------|
|            |                                    |      |            | TJQY                    | HJQF                     | HJQW                    | HJQY                     | FMQ                      | FZQ                      |
| 99         | 2-Phenyl-2-butenal                 | 1898 | 1929       | ND                      | 0.47±0.09 <sup>a</sup>   | ND                      | ND                       | 0.61±0.01 <sup>b</sup>   | 0.58±0.05 <sup>b</sup>   |
| 100        | 2-Pentanone                        | 952  | 981        | 10.29±1.26 <sup>b</sup> | 29.63±1.55 <sup>c</sup>  | ND                      | 1.34±0.15 <sup>a</sup>   | 37.54±1.93 <sup>d</sup>  | 77.14±6.67 <sup>e</sup>  |
| 101        | 2,3-Butanedione                    | 952  | 981        | ND                      | 8.07±0.57 <sup>a</sup>   | ND                      | ND                       | ND                       | ND                       |
| 102        | (E)-3-Penten-2-one                 | 1102 | 1122       | ND                      | 4.40±0.36 <sup>b</sup>   | 3.85±0.48 <sup>b</sup>  | 1.83±0.27 <sup>a</sup>   | 2.24±0.04 <sup>a</sup>   | 4.22±0.42 <sup>b</sup>   |
| 103        | 4-Methyl-3-penten-2-one            | 1108 | 1127       | ND                      | ND                       | ND                      | 1.29±0.10 <sup>a</sup>   | 1.75±0.28 <sup>b</sup>   | 2.57±0.31 <sup>c</sup>   |
| 104        | 2-Heptanone                        | 1158 | 1182       | ND                      | 86.30±6.67 <sup>a</sup>  | ND                      | ND                       | ND                       | ND                       |
| 105        | 3-Octanone                         | 1231 | 1253       | 3.15±0.40 <sup>a</sup>  | 6.89±1.99 <sup>b</sup>   | 5.36±0.55 <sup>b</sup>  | 5.21±0.23 <sup>b</sup>   | 10.04±0.15 <sup>c</sup>  | 15.41±1.62 <sup>d</sup>  |
| 106        | 3-Hydroxy-2-oxobutane              | 1256 | 1284       | 29.02±1.77 <sup>b</sup> | 32.96±2.37 <sup>c</sup>  | 37.61±3.74 <sup>d</sup> | 4.74±0.35 <sup>a</sup>   | 6.61±0.25 <sup>a</sup>   | 3.22±0.31 <sup>a</sup>   |
| 107        | 2-Octanone                         | 1261 | 1287       | 28.92±3.78 <sup>a</sup> | 36.14±4.61 <sup>b</sup>  | 35.13±1.80 <sup>b</sup> | 33.80±2.44 <sup>ab</sup> | 43.63±0.68 <sup>c</sup>  | 37.73±2.29 <sup>b</sup>  |
| 108        | 1-Hydroxy-2-propanone              | 1271 | 1303       | ND                      | 4.17±0.25 <sup>a</sup>   | ND                      | ND                       | ND                       | ND                       |
| 109        | 6-Methyl-5-hepten-2-one            | 1313 | 1338       | 21.12±0.21 <sup>a</sup> | 26.45±1.81 <sup>b</sup>  | 20.27±2.09 <sup>a</sup> | 17.7±1.57 <sup>a</sup>   | 29.86±1.29 <sup>b</sup>  | 33.89±3.70 <sup>c</sup>  |
| 110        | 5-Decanone                         | 1326 | 1373       | 0.27±0.03 <sup>ab</sup> | ND                       | 0.26±0.02 <sup>ab</sup> | 0.40±0.01 <sup>b</sup>   | 1.99±0.05 <sup>c</sup>   | 2.76±0.36 <sup>d</sup>   |
| 111        | 3-Nonanone                         | 1333 | 1360       | 5.65±0.29 <sup>c</sup>  | ND                       | 0.78±0.10 <sup>a</sup>  | ND                       | ND                       | 2.07±0.18 <sup>b</sup>   |
| 112        | 2-Nonanone                         | 1365 | 1390       | 24.78±2.41 <sup>c</sup> | 10.87±1.02 <sup>ab</sup> | 13.31±1.17 <sup>b</sup> | 9.97±0.53 <sup>a</sup>   | 34.73±1.72 <sup>d</sup>  | 11.17±1.07 <sup>ab</sup> |
| 113        | 3-Octen-2-one                      | 1379 | 1411       | 10.12±0.37 <sup>a</sup> | 27.89±2.65 <sup>c</sup>  | 14.05±1.41 <sup>b</sup> | 20.43±1.58 <sup>c</sup>  | 15.50±0.20 <sup>bc</sup> | 17.81±1.67 <sup>cd</sup> |
| 114        | (-)- $\alpha$ -Thujone             | 1391 | 1430       | 16.91±0.90 <sup>c</sup> | ND                       | ND                      | ND                       | 2.13±0.25 <sup>a</sup>   | 3.31±0.06 <sup>b</sup>   |
| 115        | $\delta$ -Camphor                  | 1479 | 1527       | 5.30±0.15 <sup>a</sup>  | 14.01±0.42 <sup>cd</sup> | 14.76±1.08 <sup>d</sup> | 12.77±1.04 <sup>c</sup>  | 7.61±0.10 <sup>b</sup>   | 24.88±1.09 <sup>c</sup>  |
| 116        | Isophorone                         | 1553 | 1582       | 3.95±0.28 <sup>c</sup>  | ND                       | 0.61±0.02 <sup>a</sup>  | ND                       | ND                       | 1.06±0.07 <sup>b</sup>   |
| 117        | 3-Methyl-2-cyclohexen-1-one        | 1556 | 1583       | ND                      | ND                       | 0.47±0.07 <sup>a</sup>  | ND                       | ND                       | ND                       |
| 118        | 6-Methyl-3,5-heptadiene-2-one      | 1561 | 1602       | 5.05±0.56 <sup>d</sup>  | 2.76±0.32 <sup>b</sup>   | 2.09±0.30 <sup>a</sup>  | 2.83±0.26 <sup>b</sup>   | 3.13±0.16 <sup>bc</sup>  | 3.45±0.08 <sup>c</sup>   |
| 119        | 2-Undecanone                       | 1571 | 1602       | 29.17±2.00 <sup>c</sup> | 12.34±1.22 <sup>a</sup>  | 20.17±1.86 <sup>b</sup> | 21.14±1.70 <sup>b</sup>  | 27.81±0.41 <sup>c</sup>  | 21.73±1.76 <sup>b</sup>  |
| 120        | Acetophenone                       | 1614 | 1647       | 5.68±0.29 <sup>a</sup>  | 5.75±0.22 <sup>a</sup>   | 5.81±0.51 <sup>a</sup>  | 8.85±0.82 <sup>b</sup>   | 15.23±0.39 <sup>c</sup>  | 15.57±1.70 <sup>c</sup>  |
| 121        | Carvone                            | 1696 | 1740       | 0.30±0.02 <sup>a</sup>  | ND                       | ND                      | ND                       | ND                       | 0.78±0.09 <sup>b</sup>   |
| 122        | 2-Tridecanone                      | 1785 | 1809       | 0.74±0.11 <sup>b</sup>  | ND                       | 0.23±0.03 <sup>a</sup>  | 0.24±0.03 <sup>a</sup>   | ND                       | 1.07±0.10 <sup>c</sup>   |
| 123        | 6,10-Dimethyl-5,9-undecadien-2-one | 1828 | 1859       | 2.83±0.21 <sup>c</sup>  | 1.28±0.10 <sup>a</sup>   | 1.16±0.17 <sup>a</sup>  | 1.40±0.11 <sup>a</sup>   | 1.69±0.13 <sup>b</sup>   | 1.21±0.19 <sup>a</sup>   |

| num<br>ber | Volatile flavor compound             | RI   | NIST<br>RI | Contents (μg/kg)        |                          |                         |                          |                         |                         |
|------------|--------------------------------------|------|------------|-------------------------|--------------------------|-------------------------|--------------------------|-------------------------|-------------------------|
|            |                                      |      |            | TJQY                    | HJQF                     | HJQW                    | HJQY                     | FMQ                     | FZQ                     |
| 124        | Trans- $\beta$ -ionone               | 1904 | 1940       | ND                      | ND                       | ND                      | ND                       | ND                      | 0.41±0.04 <sup>a</sup>  |
| 125        | 4-Methoxyacetophenone                | 2104 | 2132       | ND                      | 0.19±0.03 <sup>a</sup>   | ND                      | ND                       | ND                      | ND                      |
| 126        | Methoxy-benzine                      | 1318 | 1349       | 0.61±0.07 <sup>a</sup>  | ND                       | 1.88±0.19 <sup>b</sup>  | 1.14±0.17 <sup>ab</sup>  | 12.51±1.31 <sup>c</sup> | 15.63±0.81 <sup>d</sup> |
| 127        | 1-Methoxy-4-methyl-benzene           | 1413 | 1434       | 2.41±0.08 <sup>a</sup>  | 16.07±0.90 <sup>c</sup>  | 6.06±0.61 <sup>b</sup>  | ND                       | 30.93±0.16 <sup>d</sup> | 44.14±3.76 <sup>e</sup> |
| 128        | 1,2-Dimethoxy-benzene                | 1698 | 1718       | ND                      | 1.90±0.15 <sup>a</sup>   | ND                      | ND                       | 14.50±0.51 <sup>b</sup> | 15.41±1.57 <sup>b</sup> |
| 129        | 1,3-Dimethoxy-benzene                | 1719 | 1740       | ND                      | ND                       | ND                      | ND                       | 2.41±0.04 <sup>a</sup>  | 2.23±0.25 <sup>a</sup>  |
| 130        | (E)-1-Methoxy-4-(1-propenyl) benzene | 1798 | 1817       | 0.89±0.10 <sup>b</sup>  | 1.28±0.10 <sup>c</sup>   | ND                      | ND                       | ND                      | 0.75±0.09 <sup>a</sup>  |
| 131        | 2-Pentyl-furan                       | 1211 | 1231       | ND                      | 153.40±6.71 <sup>b</sup> | ND                      | 152.91±9.59 <sup>b</sup> | ND                      | 87.63±9.08 <sup>a</sup> |
| 132        | 3-Furaldehyde                        | 1440 | 1451       | ND                      | ND                       | 9.94±1.15 <sup>a</sup>  | ND                       | ND                      | ND                      |
| 133        | Furfural                             | 1440 | 1451       | ND                      | 9.86±0.82 <sup>c</sup>   | ND                      | 4.69±0.20 <sup>b</sup>   | 0.29±0.01 <sup>a</sup>  | ND                      |
| 134        | 2-Furanmethanol                      | 1633 | 1660       | 9.00±0.88 <sup>b</sup>  | 16.92±0.48 <sup>c</sup>  | 25.77±1.70 <sup>d</sup> | 28.24±1.56 <sup>c</sup>  | 6.52±0.13 <sup>a</sup>  | 6.09±0.53 <sup>a</sup>  |
| 135        | Pantolactone                         | 1998 | 2029       | 8.97±0.31 <sup>c</sup>  | ND                       | ND                      | 19.49±1.86 <sup>d</sup>  | 5.73±0.42 <sup>b</sup>  | 3.55±0.07 <sup>a</sup>  |
| 136        | Butyrolactone                        | 1591 | 1632       | 34.64±2.16 <sup>c</sup> | 21.6±1.33 <sup>b</sup>   | 16.40±1.54 <sup>a</sup> | 41.01±2.96 <sup>d</sup>  | 21.73±1.13 <sup>b</sup> | 16.52±0.59 <sup>a</sup> |
| 137        | 5-Ethyl-dihydro-2(3H)-furanone       | 1663 | 1694       | 10.40±0.59 <sup>b</sup> | 10.31±0.90 <sup>b</sup>  | 7.95±0.79 <sup>a</sup>  | 12.57±1.20 <sup>c</sup>  | 12.80±1.14 <sup>c</sup> | ND                      |
| 138        | Tetrahydro-6-methyl-2H-pyran-2-one   | 1753 | 1791       | 1.32±0.23 <sup>c</sup>  | 0.94±0.11 <sup>ab</sup>  | 0.85±0.12 <sup>a</sup>  | 1.15±0.13 <sup>bc</sup>  | 0.96±0.03 <sup>ab</sup> | 0.92±0.09 <sup>ab</sup> |
| 139        | Dihydro-5-propyl-2(3H)-furanone      | 1767 | 1787       | 1.50±0.15 <sup>b</sup>  | 0.93±0.12 <sup>a</sup>   | ND                      | 1.08±0.17 <sup>a</sup>   | 1.59±0.14 <sup>b</sup>  | 1.00±0.07 <sup>a</sup>  |
| 140        | $\gamma$ -Octanoic lactone           | 1882 | 1910       | 2.54±0.21 <sup>ab</sup> | 6.59±0.64 <sup>d</sup>   | 2.25±0.25 <sup>a</sup>  | 3.82±0.28 <sup>c</sup>   | 2.96±0.35 <sup>b</sup>  | 2.28±0.18 <sup>a</sup>  |
| 141        | Dihydro-5-pentyl-2(3H)-furanone      | 1998 | 2029       | 5.05±0.19 <sup>c</sup>  | 2.54±0.36 <sup>a</sup>   | 3.39±0.44 <sup>b</sup>  | 2.80±0.06 <sup>a</sup>   | 6.56±0.17 <sup>d</sup>  | 3.48±0.23 <sup>b</sup>  |
| 142        | Dimethyl disulfide                   | 1049 | 1074       | 6.40±0.85 <sup>c</sup>  | 8.12±0.59 <sup>d</sup>   | 1.87±0.32 <sup>a</sup>  | 2.01±0.13 <sup>a</sup>   | 4.43±0.65 <sup>b</sup>  | 10.75±1.34 <sup>c</sup> |
| 143        | Dimethyl trisulfide                  | 1350 | 1377       | ND                      | ND                       | ND                      | ND                       | 7.71±0.56 <sup>a</sup>  | 9.97±0.76 <sup>b</sup>  |
| 144        | Pyridine                             | 1151 | 1185       | 4.21±0.56 <sup>ab</sup> | 4.00±0.58 <sup>ab</sup>  | 3.55±0.33 <sup>a</sup>  | 3.93±0.35 <sup>ab</sup>  | 4.57±0.04 <sup>bc</sup> | 5.36±0.56 <sup>c</sup>  |
| 145        | Pyrazine                             | 1186 | 1212       | ND                      | 7.27±0.56 <sup>d</sup>   | 2.48±0.27 <sup>c</sup>  | 1.53±0.08 <sup>b</sup>   | 0.96±0.18 <sup>a</sup>  | 1.25±0.18 <sup>ab</sup> |
| 146        | 2-Methyl-pyrazine                    | 1238 | 1266       | 0.69±0.09 <sup>a</sup>  | 32.29±2.39 <sup>d</sup>  | 10.90±1.03 <sup>c</sup> | 4.58±0.53 <sup>b</sup>   | 3.95±0.47 <sup>b</sup>  | 5.64±0.62 <sup>b</sup>  |
| 147        | 3-Methyl-pyridine                    | 1261 | 1287       | 8.52±0.55 <sup>d</sup>  | 2.97±0.29 <sup>b</sup>   | 3.19±0.37 <sup>b</sup>  | 4.26±0.46 <sup>c</sup>   | 0.98±0.05 <sup>a</sup>  | 1.40±0.11 <sup>a</sup>  |
| 148        | 2,5-Dimethyl-pyrazine                | 1293 | 1320       | ND                      | 3.84±0.18 <sup>c</sup>   | 2.98±0.41 <sup>b</sup>  | 1.78±0.22 <sup>a</sup>   | 3.43±0.36 <sup>bc</sup> | 2.91±0.38 <sup>b</sup>  |

| num<br>ber | Volatile flavor compound                               | RI   | NIST<br>RI | Contents (μg/kg)          |                         |                          |                         |                           |                             |
|------------|--------------------------------------------------------|------|------------|---------------------------|-------------------------|--------------------------|-------------------------|---------------------------|-----------------------------|
|            |                                                        |      |            | TJQY                      | HJQF                    | HJQW                     | HJQY                    | FMQ                       | FZQ                         |
| 149        | 2,6-Dimethyl-pyrazine                                  | 1298 | 1328       | 8.90±0.43 <sup>a</sup>    | 14.21±0.88 <sup>c</sup> | 13.51±1.46 <sup>bc</sup> | 7.76±0.76 <sup>a</sup>  | 15.01±1.15 <sup>c</sup>   | 12.17±1.15 <sup>b</sup>     |
| 150        | 2-Ethyl-pyrazine                                       | 1306 | 1337       | ND                        | 9.93±0.82 <sup>c</sup>  | 3.11±0.29 <sup>b</sup>   | 1.56±0.07 <sup>a</sup>  | 1.69±0.10 <sup>a</sup>    | 1.66±0.24 <sup>a</sup>      |
| 151        | 2,3-Dimethyl-pyrazine                                  | 1316 | 1344       | 0.39±0.06 <sup>a</sup>    | 7.40±0.30 <sup>b</sup>  | ND                       | 0.74±0.04 <sup>a</sup>  | 18.70±0.85 <sup>d</sup>   | 14.71±0.80 <sup>c</sup>     |
| 152        | 3-Ethyl-pyridine                                       | 1347 | 1377       | ND                        | ND                      | 0.21±0.02 <sup>a</sup>   | ND                      | ND                        | ND                          |
| 153        | 2,3,5-Trimethyl pyrazine                               | 1372 | 1402       | 2.27±0.07 <sup>a</sup>    | 12.84±0.47 <sup>c</sup> | 5.01±0.54 <sup>b</sup>   | 2.15±0.16 <sup>a</sup>  | 36.89±0.88 <sup>c</sup>   | 29.76±2.74 <sup>d</sup>     |
| 154        | 2,3-Dimethyl-5-ethylpyrazine                           | 1430 | 1460       | 0.23±0.02 <sup>a</sup>    | ND                      | ND                       | ND                      | 7.27±0.21 <sup>b</sup>    | 8.32±0.69 <sup>c</sup>      |
| 155        | Tetramethyl-pyrazine                                   | 1443 | 1469       | 1.41±0.05 <sup>a</sup>    | 27.42±2.22 <sup>b</sup> | 6.65±0.67 <sup>a</sup>   | 2.21±0.34 <sup>a</sup>  | 142.95±0.54 <sup>c</sup>  | 147.22±13.88 <sup>c</sup>   |
| 156        | 2-Pentyl-pyridine                                      | 1541 | 1578       | ND                        | 0.64±0.05 <sup>b</sup>  | ND                       | 0.49±0.05 <sup>a</sup>  | ND                        | 0.72±0.10 <sup>b</sup>      |
| 157        | 1-(2-Pyridinyl)-ethanone                               | 1568 | 1597       | ND                        | ND                      | ND                       | 0.69±0.08 <sup>a</sup>  | ND                        | ND                          |
| 158        | 1-Methyl-2-pyrrolidinone                               | 1628 | 1665       | 0.47±0.05 <sup>a</sup>    | ND                      | ND                       | ND                      | ND                        | ND                          |
| 159        | 1-(1H-Pyrrol-2-yl)-ethanone                            | 1943 | 1973       | 0.46±0.04 <sup>a</sup>    | 2.61±0.39 <sup>c</sup>  | 4.84±0.61 <sup>d</sup>   | 1.25±0.10 <sup>b</sup>  | ND                        | ND                          |
| 160        | Benzothiazole                                          | 1918 | 1958       | 0.46±0.04 <sup>a</sup>    | ND                      | ND                       | ND                      | 1.89±0.04 <sup>b</sup>    | 2.71±0.16 <sup>c</sup>      |
| 161        | 2-Methoxy-phenol                                       | 1831 | 1861       | 1.31±0.16 <sup>b</sup>    | ND                      | ND                       | ND                      | ND                        | 0.93±0.02 <sup>a</sup>      |
| 162        | Phenol                                                 | 1978 | 2000       | 8.05±0.54 <sup>a</sup>    | 7.84±0.38 <sup>a</sup>  | ND                       | ND                      | ND                        | 29.90±1.48 <sup>b</sup>     |
| 163        | 4-Ethyl-2-methoxy-phenol                               | 2003 | 2032       | 1.35±0.11 <sup>a</sup>    | 6.47±0.06 <sup>c</sup>  | ND                       | 2.81±0.23 <sup>b</sup>  | 3.09±0.40 <sup>b</sup>    | 3.03±0.43 <sup>b</sup>      |
| 164        | 3-Methyl-phenol                                        | 2061 | 2091       | 3.87±0.39 <sup>b</sup>    | ND                      | 1.13±0.06 <sup>a</sup>   | ND                      | ND                        | 3.69±0.24 <sup>b</sup>      |
| 165        | p-Methyphenol                                          | 2050 | 2080       | 1.11±0.12 <sup>a</sup>    | 4.06±0.38 <sup>b</sup>  | ND                       | 5.43±0.50 <sup>c</sup>  | 7.61±0.73 <sup>d</sup>    | 7.19±0.65 <sup>d</sup>      |
| 166        | 4-Allyl-2-methoxy-pheno                                | 2133 | 2171       | ND                        | 1.58±0.23 <sup>b</sup>  | ND                       | 0.89±0.03 <sup>a</sup>  | ND                        | ND                          |
| 167        | 2-Isopropyl-5-methyl-pheno                             | 2151 | 2189       | ND                        | ND                      | ND                       | 0.49±0.05 <sup>a</sup>  | ND                        | ND                          |
| 168        | 2-Nonene                                               | 926  | 943        | ND                        | ND                      | 9.62±0.69 <sup>ab</sup>  | ND                      | 21.35±0.84 <sup>b</sup>   | 94.70±16.30 <sup>c</sup>    |
| 169        | Trans-4-decene                                         | 1008 | 1039       | 247.36±24.02 <sup>d</sup> | ND                      | 69.01±12.36 <sup>b</sup> | 37.83±3.38 <sup>a</sup> | 187.28±18.64 <sup>c</sup> | ND                          |
| 170        | α-Pinene                                               | 1007 | 1028       | ND                        | ND                      | ND                       | ND                      | ND                        | 646.10±32.50 <sup>a</sup>   |
| 171        | Camphene                                               | 1042 | 1071       | ND                        | ND                      | 0.89±0.09 <sup>a</sup>   | ND                      | ND                        | 1202.16±143.23 <sup>b</sup> |
| 172        | 4-Methylene-1-(1-methylethyl)-<br>bicyclo[3.1.0]hexane | 1099 | 1124       | 3.45±0.47 <sup>b</sup>    | ND                      | 0.96±0.11 <sup>ab</sup>  | 2.20±0.29 <sup>ab</sup> | ND                        | 40.22±3.93 <sup>c</sup>     |
| 173        | 5-Undecene                                             | 1121 | 1092       | ND                        | ND                      | 52.61±5.22 <sup>a</sup>  | 46.40±4.53 <sup>a</sup> | 89.94±5.99 <sup>b</sup>   | 121.95±14.42 <sup>c</sup>   |

| num<br>ber | Volatile flavor compound                    | RI   | NIST<br>RI | Contents (μg/kg)          |                          |                         |                         |                          |                           |
|------------|---------------------------------------------|------|------------|---------------------------|--------------------------|-------------------------|-------------------------|--------------------------|---------------------------|
|            |                                             |      |            | TJQY                      | HJQF                     | HJQW                    | HJQY                    | FMQ                      | FZQ                       |
| 174        | 1-Undecene                                  | 1129 | 1147       | 142.58±13.66 <sup>c</sup> | ND                       | 32.26±3.15 <sup>a</sup> | 39.17±3.68 <sup>a</sup> | 119.00±7.72 <sup>b</sup> | 191.69±18.66 <sup>d</sup> |
| 175        | 7-Methyl-3-methylene-1,6-octadiene          | 1143 | 1161       | 26.90±1.70 <sup>c</sup>   | ND                       | 0.67±0.05 <sup>a</sup>  | 5.94±0.55 <sup>b</sup>  | ND                       | 66.83±5.50 <sup>d</sup>   |
| 176        | (1-Methylethyl)-benzene                     | 1149 | 1178       | 30.17±2.60 <sup>d</sup>   | 0.5±0.02 <sup>a</sup>    | 8.74±0.86 <sup>b</sup>  | 10.6±0.86 <sup>b</sup>  | 25.38±2.40 <sup>c</sup>  | 49.66±4.12 <sup>e</sup>   |
| 177        | Limonene                                    | 1176 | 1200       | 61.80±2.70 <sup>b</sup>   | ND                       | ND                      | ND                      | 22.16±0.64 <sup>a</sup>  | 185.87±15.53 <sup>c</sup> |
| 178        | γ-Terpinene                                 | 1224 | 1246       | 1.87±0.26 <sup>ab</sup>   | 1.65±0.17 <sup>ab</sup>  | 2.29±0.26 <sup>ab</sup> | 2.78±0.42 <sup>b</sup>  | ND                       | 85.09±3.38 <sup>c</sup>   |
| 179        | 3,7-Dimethyl-1,3,6-octatriene               | 1232 | 1250       | 0.27±0.04 <sup>a</sup>    | ND                       | ND                      | ND                      | ND                       | 3.50±0.55 <sup>b</sup>    |
| 180        | Ethenyl benzene                             | 1234 | 1261       | 58.52±3.08 <sup>c</sup>   | 34.82±1.03 <sup>b</sup>  | 20.16±0.87 <sup>a</sup> | 19.36±1.64 <sup>a</sup> | 72.97±0.64 <sup>d</sup>  | 117.92±9.12 <sup>c</sup>  |
| 181        | 1-Methyl-4-(1-methylethyl)-benzen           | 1246 | 1272       | ND                        | 7.42±0.39 <sup>a</sup>   | 6.77±0.65 <sup>a</sup>  | ND                      | ND                       | 261.51±20.93 <sup>b</sup> |
| 182        | 1-Methyl-4-(1-methylethylidene)-cyclohexene | 1259 | 1283       | 0.73±0.06 <sup>ab</sup>   | 0.93±0.10 <sup>abc</sup> | 1.36±0.16 <sup>bc</sup> | 1.87±0.21 <sup>c</sup>  | ND                       | 11.28±1.36 <sup>d</sup>   |
| 183        | (Z)-4-Tridecene                             | 1322 | 1334       | 38.44±4.19 <sup>a</sup>   | ND                       | ND                      | ND                      | 50.99±4.47 <sup>b</sup>  | 66.65±4.39 <sup>c</sup>   |
| 184        | 1-Tridecene                                 | 1334 | 1343       | 80.64±2.19 <sup>b</sup>   | ND                       | 13.53±1.33 <sup>a</sup> | 15.47±1.06 <sup>a</sup> | 76.66±3.46 <sup>b</sup>  | 99.27±5.01 <sup>c</sup>   |
| 185        | Copaene                                     | 1470 | 1492       | 9.56±0.34 <sup>a</sup>    | ND                       | ND                      | ND                      | ND                       | 34.06±3.56 <sup>b</sup>   |
| 186        | β-Caryophyllene                             | 1567 | 1595       | 12.30±0.93 <sup>a</sup>   | 143.04±4.95 <sup>d</sup> | 33.85±3.42 <sup>b</sup> | 56.91±3.27 <sup>c</sup> | 16.62±0.33 <sup>a</sup>  | 39.22±3.25 <sup>b</sup>   |
| 187        | α-Caryophyllene                             | 1637 | 1667       | 1.03±0.12 <sup>a</sup>    | 5.73±0.03 <sup>c</sup>   | 1.84±0.27 <sup>b</sup>  | 3.14±0.10 <sup>c</sup>  | ND                       | 3.55±0.23 <sup>d</sup>    |
| 188        | 2,6,10,14-Tetramethyl-pentadecane           | 1676 | 1670       | ND                        | ND                       | ND                      | ND                      | 4.38±0.32 <sup>a</sup>   | 8.57±0.47 <sup>b</sup>    |
| 189        | Naphthalene                                 | 1701 | 1745       | 4.13±0.23 <sup>a</sup>    | 17.46±1.21 <sup>b</sup>  | 24.42±2.46 <sup>c</sup> | 34.66±1.95 <sup>d</sup> | 6.14±0.23 <sup>a</sup>   | 15.08±1.51 <sup>b</sup>   |
| 190        | 2-Methyl-naphthalene                        | 1815 | 1858       | 0.30±0.02 <sup>a</sup>    | 7.27±0.69 <sup>c</sup>   | 10.51±0.96 <sup>d</sup> | 12.36±0.91 <sup>c</sup> | 3.72±0.50 <sup>b</sup>   | 7.30±0.66 <sup>c</sup>    |
| 191        | 1-Methyl-naphthalene                        | 1853 | 1884       | 1.08±0.06 <sup>a</sup>    | 3.64±0.39 <sup>b</sup>   | 6.27±0.64 <sup>c</sup>  | 7.43±0.38 <sup>d</sup>  | ND                       | 4.15±0.18 <sup>b</sup>    |

ND -, not detected; The letters a, b, c were used to indicate the significance, the same marked letter was not significant difference ( $P \geq 0.05$ ), different marked letter was significant difference ( $P < 0.05$ ).

**Table S2.** The relationship between flavor compounds and dominant microbial genera

| interaction    | Microorganism                            | Flavor compounds           | p_value | Correlation |
|----------------|------------------------------------------|----------------------------|---------|-------------|
| interacts with | <i>unclassified_o__Saccharomycetales</i> | Ethyl Acetate              | 0.0499  | -0.8117     |
| interacts with | <i>Saccharomycopsis</i>                  | Pentanoic acid ethyl ester | 0.0416  | 0.8286      |

| interaction    | Microorganism                            | Flavor compounds              | p_value | Correlation |
|----------------|------------------------------------------|-------------------------------|---------|-------------|
| interacts with | <i>Lactococcus</i>                       | 2-Nonanone                    | 0.0048  | -0.9429     |
| interacts with | <i>Weissella</i>                         | 2-Nonanone                    | 0.0188  | 0.8857      |
| interacts with | <i>Millerozyma</i>                       | 2-Nonanone                    | 0.0244  | -0.8697     |
| interacts with | <i>Wickerhamomyces</i>                   | 2-Nonanone                    | 0.0416  | 0.8286      |
| interacts with | <i>Rhizopus</i>                          | 3-Octen-2-one                 | 0.0048  | -0.9429     |
| interacts with | <i>Saccharomycopsis</i>                  | 3-Octen-2-one                 | 0.0188  | 0.8857      |
| interacts with | <i>unclassified_f_Enterobacteriaceae</i> | (-)- $\alpha$ -Thujone        | 0.0458  | 0.8197      |
| interacts with | <i>Acetobacter</i>                       | (-)- $\alpha$ -Thujone        | 0.0401  | -0.8317     |
| interacts with | <i>Kosakonia</i>                         | (-)- $\alpha$ -Thujone        | 0.0051  | 0.9411      |
| interacts with | <i>unclassified_k_norank_d_Bacteria</i>  | (-)- $\alpha$ -Thujone        | 0.0206  | -0.8804     |
| interacts with | <i>Weissella</i>                         | (-)- $\alpha$ -Thujone        | 0.0206  | 0.8804      |
| interacts with | <i>Millerozyma</i>                       | (-)- $\alpha$ -Thujone        | 0.0401  | -0.8317     |
| interacts with | <i>Leuconostoc</i>                       | Isophorone                    | 0.0206  | -0.8804     |
| interacts with | <i>Apiotrichum</i>                       | 6-Methyl-3,5-heptadiene-2-one | 0.0499  | -0.8117     |
| interacts with | <i>unclassified_f_Enterobacteriaceae</i> | 6-Methyl-3,5-heptadiene-2-one | 0.0149  | 0.8986      |
| interacts with | <i>Pseudomonas</i>                       | 6-Methyl-3,5-heptadiene-2-one | 0.0361  | -0.8407     |
| interacts with | <i>Rhodococcus</i>                       | 6-Methyl-3,5-heptadiene-2-one | 0.0361  | -0.8407     |
| interacts with | <i>Kosakonia</i>                         | 6-Methyl-3,5-heptadiene-2-one | 0.0149  | 0.8986      |
| interacts with | <i>unclassified_k_norank_d_Bacteria</i>  | 6-Methyl-3,5-heptadiene-2-one | 0.0077  | -0.9276     |
| interacts with | <i>Kodamaea</i>                          | 2-Undecanone                  | 0.0048  | -0.9429     |
| interacts with | <i>Issatchenkia</i>                      | 2-Undecanone                  | 0.0048  | -0.9429     |
| interacts with | <i>Candida</i>                           | 2-Undecanone                  | 0.0048  | -0.9429     |
| interacts with | <i>Kozakia</i>                           | 2-Undecanone                  | 0.0341  | -0.8452     |
| interacts with | <i>Acetobacter</i>                       | 2-Undecanone                  | 0.0003  | -0.9856     |
| interacts with | <i>Kosakonia</i>                         | 2-Undecanone                  | 0.0048  | 0.9429      |
| interacts with | <i>Weissella</i>                         | 2-Undecanone                  | 0.0416  | 0.8286      |
| interacts with | <i>Millerozyma</i>                       | 2-Undecanone                  | 0.0077  | -0.9276     |
| interacts with | <i>Pseudomonas</i>                       | Carvone                       | 0.0341  | -0.8452     |

| interaction    | Microorganism                            | Flavor compounds                  | p_value | Correlation |
|----------------|------------------------------------------|-----------------------------------|---------|-------------|
| interacts with | <i>Rhodococcus</i>                       | Carvone                           | 0.0341  | -0.8452     |
| interacts with | <i>Staphylococcus</i>                    | Carvone                           | 0.0341  | 0.8452      |
| interacts with | <i>Leuconostoc</i>                       | Carvone                           | 0.0341  | -0.8452     |
| interacts with | <i>unclassified_k_norank_d_Bacteria</i>  | Carvone                           | 0.0341  | -0.8452     |
| interacts with | <i>Leuconostoc</i>                       | 2-Tridecanone                     | 0.0012  | -0.9710     |
| interacts with | <i>Clavispora</i>                        | Acetic acid pentyl ester          | 0.0341  | -0.8452     |
| interacts with | <i>Apiotrichum</i>                       | Acetic acid pentyl ester          | 0.0341  | -0.8452     |
| interacts with | <i>Pediococcus</i>                       | Acetic acid pentyl ester          | 0.0341  | 0.8452      |
| interacts with | <i>unclassified_o_Saccharomycetales</i>  | Acetic acid pentyl ester          | 0.0441  | -0.8232     |
| interacts with | <i>unclassified_f_Metschnikowiaceae</i>  | Acetic acid pentyl ester          | 0.0341  | -0.8452     |
| interacts with | <i>Apiotrichum</i>                       | (1-Methylethyl)-benzene           | 0.0188  | -0.8857     |
| interacts with | <i>Kozakia</i>                           | (1-Methylethyl)-benzene           | 0.0341  | -0.8452     |
| interacts with | <i>unclassified_f_Enterobacteriaceae</i> | (1-Methylethyl)-benzene           | 0.0416  | 0.8286      |
| interacts with | <i>Pseudomonas</i>                       | (1-Methylethyl)-benzene           | 0.0188  | -0.8857     |
| interacts with | <i>Rhodococcus</i>                       | (1-Methylethyl)-benzene           | 0.0188  | -0.8857     |
| interacts with | <i>Acetobacter</i>                       | (1-Methylethyl)-benzene           | 0.0499  | -0.8117     |
| interacts with | <i>Kosakonia</i>                         | (1-Methylethyl)-benzene           | 0.0048  | 0.9429      |
| interacts with | <i>unclassified_k_norank_d_Bacteria</i>  | (1-Methylethyl)-benzene           | 0.0048  | -0.9429     |
| interacts with | <i>Pediococcus</i>                       | (1-Methylethyl)-benzene           | 0.0048  | 0.9429      |
| interacts with | <i>Geotrichum</i>                        | Ethenyl benzene                   | 0.0188  | -0.8857     |
| interacts with | <i>Clavispora</i>                        | Ethenyl benzene                   | 0.0048  | -0.9429     |
| interacts with | <i>Apiotrichum</i>                       | Ethenyl benzene                   | 0.0416  | -0.8286     |
| interacts with | <i>unclassified_f_Metschnikowiaceae</i>  | Ethenyl benzene                   | 0.0048  | -0.9429     |
| interacts with | <i>Wickerhamomyces</i>                   | Ethenyl benzene                   | 0.0416  | 0.8286      |
| interacts with | <i>norank_f_norank_o_Chloroplast</i>     | 1-Methyl-4-(1-methylethyl)-benzen | 0.0206  | -0.8804     |
| interacts with | <i>unclassified_o_Saccharomycetales</i>  | 1-Methoxy-4-methyl-benzene        | 0.0499  | -0.8117     |
| interacts with | <i>Acinetobacter</i>                     | Benzaldehyde                      | 0.0416  | -0.8286     |
| interacts with | <i>Clavispora</i>                        | Benzeneacetaldehyde               | 0.0048  | 0.9429      |

| interaction    | Microorganism                            | Flavor compounds                    | p_value | Correlation |
|----------------|------------------------------------------|-------------------------------------|---------|-------------|
| interacts with | <i>Apiotrichum</i>                       | Benzeneacetaldehyde                 | 0.0416  | 0.8286      |
| interacts with | <i>Pediococcus</i>                       | Benzeneacetaldehyde                 | 0.0048  | -0.9429     |
| interacts with | <i>unclassified_f__Metschnikowiaceae</i> | Benzeneacetaldehyde                 | 0.0048  | 0.9429      |
| interacts with | <i>Millerozyma</i>                       | Benzeneacetaldehyde                 | 0.0499  | 0.8117      |
| interacts with | <i>unclassified_o__Saccharomycetales</i> | Acetophenone                        | 0.0199  | -0.8824     |
| interacts with | <i>unclassified_o__Saccharomycetales</i> | 4-Methyl-Pentanoic acid ethyl ester | 0.0003  | -0.9856     |
| interacts with | <i>Geotrichum</i>                        | Ethyl benzoate                      | 0.0416  | -0.8286     |
| interacts with | <i>Kodamaea</i>                          | Ethyl benzoate                      | 0.0048  | -0.9429     |
| interacts with | <i>Issatchenkia</i>                      | Ethyl benzoate                      | 0.0048  | -0.9429     |
| interacts with | <i>Apiotrichum</i>                       | Ethyl benzoate                      | 0.0188  | -0.8857     |
| interacts with | <i>Candida</i>                           | Ethyl benzoate                      | 0.0048  | -0.9429     |
| interacts with | <i>Kozakia</i>                           | Ethyl benzoate                      | 0.0341  | -0.8452     |
| interacts with | <i>Acetobacter</i>                       | Ethyl benzoate                      | 0.0149  | -0.8986     |
| interacts with | <i>Pediococcus</i>                       | Ethyl benzoate                      | 0.0048  | 0.9429      |
| interacts with | <i>unclassified_f__Dipodascaceae</i>     | Ethyl benzoate                      | 0.0048  | -0.9429     |
| interacts with | <i>Millerozyma</i>                       | Ethyl benzoate                      | 0.0361  | -0.8407     |
| interacts with | <i>unclassified_o__Saccharomycetales</i> | 1,2-Dimethoxy-benzene               | 0.0084  | -0.9241     |
| interacts with | <i>Lactobacillus</i>                     | Naphthalene                         | 0.0416  | 0.8286      |
| interacts with | <i>Weissella</i>                         | Naphthalene                         | 0.0048  | -0.9429     |
| interacts with | <i>Millerozyma</i>                       | Naphthalene                         | 0.0499  | 0.8117      |
| interacts with | <i>Wickerhamomyces</i>                   | Naphthalene                         | 0.0048  | -0.9429     |
| interacts with | <i>Geotrichum</i>                        | 1,3-Dimethoxy-benzene               | 0.0341  | -0.8452     |
| interacts with | <i>unclassified_o__Saccharomycetales</i> | 1,3-Dimethoxy-benzene               | 0.0441  | -0.8232     |
| interacts with | <i>unclassified_f__Dipodascaceae</i>     | 1,3-Dimethoxy-benzene               | 0.0341  | -0.8452     |
| interacts with | <i>Clavispora</i>                        | n-Propyl benzoate                   | 0.0048  | -0.9429     |
| interacts with | <i>Apiotrichum</i>                       | n-Propyl benzoate                   | 0.0416  | -0.8286     |
| interacts with | <i>Pediococcus</i>                       | n-Propyl benzoate                   | 0.0048  | 0.9429      |
| interacts with | <i>unclassified_f__Metschnikowiaceae</i> | n-Propyl benzoate                   | 0.0048  | -0.9429     |

| interaction    | Microorganism                           | Flavor compounds                | p_value | Correlation |
|----------------|-----------------------------------------|---------------------------------|---------|-------------|
| interacts with | <i>Millerozyma</i>                      | n-Propyl benzoate               | 0.0499  | -0.8117     |
| interacts with | <i>Rhizopus</i>                         | Acetic acid 2-phenylethyl ester | 0.0149  | -0.8986     |
| interacts with | <i>Millerozyma</i>                      | Acetic acid 2-phenylethyl ester | 0.0440  | 0.8235      |
| interacts with | <i>Lactobacillus</i>                    | 2-Methyl-naphthalene            | 0.0149  | 0.8986      |
| interacts with | <i>Weissella</i>                        | 2-Methyl-naphthalene            | 0.0149  | -0.8986     |
| interacts with | <i>Wickerhamomyces</i>                  | 2-Methyl-naphthalene            | 0.0077  | -0.9276     |
| interacts with | <i>Pseudomonas</i>                      | Butyl benzoate                  | 0.0341  | -0.8452     |
| interacts with | <i>Rhodococcus</i>                      | Butyl benzoate                  | 0.0341  | -0.8452     |
| interacts with | <i>Staphylococcus</i>                   | Butyl benzoate                  | 0.0341  | 0.8452      |
| interacts with | <i>Leuconostoc</i>                      | Butyl benzoate                  | 0.0341  | -0.8452     |
| interacts with | <i>unclassified_k_norank_d_Bacteria</i> | Butyl benzoate                  | 0.0341  | -0.8452     |
| interacts with | <i>Kodamaea</i>                         | Benzyl alcohol                  | 0.0416  | -0.8286     |
| interacts with | <i>Issatchenkia</i>                     | Benzyl alcohol                  | 0.0416  | -0.8286     |
| interacts with | <i>Apiotrichum</i>                      | Benzyl alcohol                  | 0.0416  | -0.8286     |
| interacts with | <i>Candida</i>                          | Benzyl alcohol                  | 0.0416  | -0.8286     |
| interacts with | <i>Kozakia</i>                          | Benzyl alcohol                  | 0.0341  | -0.8452     |
| interacts with | <i>Pediococcus</i>                      | Benzyl alcohol                  | 0.0188  | 0.8857      |
| interacts with | <i>unclassified_f_Dipodascaceae</i>     | Benzyl alcohol                  | 0.0188  | -0.8857     |
| interacts with | <i>Lactococcus</i>                      | 1-Methyl-naphthalene            | 0.0416  | 0.8286      |
| interacts with | <i>Lactobacillus</i>                    | 1-Methyl-naphthalene            | 0.0188  | 0.8857      |
| interacts with | <i>Wickerhamomyces</i>                  | 1-Methyl-naphthalene            | 0.0048  | -0.9429     |
| interacts with | <i>Clavispora</i>                       | Phenylethyl alcohol             | 0.0048  | 0.9429      |
| interacts with | <i>Apiotrichum</i>                      | Phenylethyl alcohol             | 0.0416  | 0.8286      |
| interacts with | <i>Pediococcus</i>                      | Phenylethyl alcohol             | 0.0048  | -0.9429     |
| interacts with | <i>unclassified_f_Metschnikowiaceae</i> | Phenylethyl alcohol             | 0.0048  | 0.9429      |
| interacts with | <i>Millerozyma</i>                      | Phenylethyl alcohol             | 0.0499  | 0.8117      |
| interacts with | <i>unclassified_o_Saccharomycetales</i> | 2-Phenyl-2-butenal              | 0.0054  | -0.9393     |
| interacts with | <i>Apiotrichum</i>                      | 2-Hydroxy-benzoicacimethylester | 0.0188  | -0.8857     |



| interaction    | Microorganism                             | Flavor compounds                   | p_value | Correlation |
|----------------|-------------------------------------------|------------------------------------|---------|-------------|
| interacts with | <i>Kozakia</i>                            | 2-Hydroxy-benzoicacimethylester    | 0.0341  | -0.8452     |
| interacts with | <i>Pediococcus</i>                        | 2-Hydroxy-benzoicacimethylester    | 0.0048  | 0.9429      |
| interacts with | <i>unclassified_f__Dipodascaceae</i>      | 2-Hydroxy-benzoicacimethylester    | 0.0416  | -0.8286     |
| interacts with | <i>Kodamaea</i>                           | 2-Hydroxy-benzaldehyde             | 0.0188  | 0.8857      |
| interacts with | <i>Issatchenkia</i>                       | 2-Hydroxy-benzaldehyde             | 0.0188  | 0.8857      |
| interacts with | <i>Candida</i>                            | 2-Hydroxy-benzaldehyde             | 0.0188  | 0.8857      |
| interacts with | <i>unclassified_f__Enterobacteriaceae</i> | 2-Hydroxy-benzaldehyde             | 0.0416  | -0.8286     |
| interacts with | <i>Acetobacter</i>                        | 2-Hydroxy-benzaldehyde             | 0.0077  | 0.9276      |
| interacts with | <i>Kosakonia</i>                          | 2-Hydroxy-benzaldehyde             | 0.0188  | -0.8857     |
| interacts with | <i>unclassified_k__norank_d__Bacteria</i> | 2-Hydroxy-benzaldehyde             | 0.0416  | 0.8286      |
| interacts with | <i>unclassified_f__Dipodascaceae</i>      | 2-Hydroxy-benzaldehyde             | 0.0416  | 0.8286      |
| interacts with | <i>Millerozyma</i>                        | 2-Hydroxy-benzaldehyde             | 0.0499  | 0.8117      |
| interacts with | <i>Rhizopus</i>                           | 2-Pentyl-furan                     | 0.0206  | -0.8804     |
| interacts with | <i>Saccharomycopsis</i>                   | 2-Pentyl-furan                     | 0.0206  | 0.8804      |
| interacts with | <i>Millerozyma</i>                        | 2-Pentyl-furan                     | 0.0401  | 0.8317      |
| interacts with | <i>Leuconostoc</i>                        | Furfural                           | 0.0206  | 0.8804      |
| interacts with | <i>Geotrichum</i>                         | 2-Furanmethanol                    | 0.0188  | 0.8857      |
| interacts with | <i>Clavispora</i>                         | 2-Furanmethanol                    | 0.0048  | 0.9429      |
| interacts with | <i>Apiotrichum</i>                        | 2-Furanmethanol                    | 0.0416  | 0.8286      |
| interacts with | <i>unclassified_f__Metschnikowiaceae</i>  | 2-Furanmethanol                    | 0.0048  | 0.9429      |
| interacts with | <i>Wickerhamomyces</i>                    | 2-Furanmethanol                    | 0.0416  | -0.8286     |
| interacts with | <i>Kozakia</i>                            | Pantolactone                       | 0.0441  | -0.8232     |
| interacts with | <i>Acinetobacter</i>                      | Pantolactone                       | 0.0244  | 0.8697      |
| interacts with | <i>norank_f__norank_o__Chloroplast</i>    | 5-Ethyldihydro-2(3H)-furanone      | 0.0416  | 0.8286      |
| interacts with | <i>Acinetobacter</i>                      | Tetrahydro-6-methyl-2H-pyran-2-one | 0.0499  | 0.8117      |
| interacts with | <i>Kodamaea</i>                           | Dihydro-5-propyl-2(3H)-furanone    | 0.0188  | -0.8857     |
| interacts with | <i>Issatchenkia</i>                       | Dihydro-5-propyl-2(3H)-furanone    | 0.0188  | -0.8857     |
| interacts with | <i>Candida</i>                            | Dihydro-5-propyl-2(3H)-furanone    | 0.0188  | -0.8857     |

| interaction    | Microorganism                           | Flavor compounds                | p_value | Correlation |
|----------------|-----------------------------------------|---------------------------------|---------|-------------|
| interacts with | <i>Acetobacter</i>                      | Dihydro-5-propyl-2(3H)-furanone | 0.0244  | -0.8697     |
| interacts with | <i>unclassified_f_Dipodascaceae</i>     | Dihydro-5-propyl-2(3H)-furanone | 0.0416  | -0.8286     |
| interacts with | <i>Kodamaea</i>                         | Dihydro-5-propyl-2(3H)-furanone | 0.0048  | -0.9429     |
| interacts with | <i>Issatchenkia</i>                     | Dihydro-5-propyl-2(3H)-furanone | 0.0048  | -0.9429     |
| interacts with | <i>Candida</i>                          | Dihydro-5-propyl-2(3H)-furanone | 0.0048  | -0.9429     |
| interacts with | <i>Acetobacter</i>                      | Dihydro-5-propyl-2(3H)-furanone | 0.0077  | -0.9276     |
| interacts with | <i>Weissella</i>                        | Dihydro-5-propyl-2(3H)-furanone | 0.0188  | 0.8857      |
| interacts with | <i>Millerozyma</i>                      | Dihydro-5-propyl-2(3H)-furanone | 0.0003  | -0.9856     |
| interacts with | <i>Wickerhamomyces</i>                  | Dihydro-5-propyl-2(3H)-furanone | 0.0416  | 0.8286      |
| interacts with | <i>Clavispora</i>                       | Dimethyl trisulfide             | 0.0341  | -0.8452     |
| interacts with | <i>Apiotrichum</i>                      | Dimethyl trisulfide             | 0.0341  | -0.8452     |
| interacts with | <i>Pediococcus</i>                      | Dimethyl trisulfide             | 0.0341  | 0.8452      |
| interacts with | <i>unclassified_o_Saccharomycetales</i> | Dimethyl trisulfide             | 0.0441  | -0.8232     |
| interacts with | <i>unclassified_f_Metschnikowiaceae</i> | Dimethyl trisulfide             | 0.0341  | -0.8452     |
| interacts with | <i>unclassified_o_Saccharomycetales</i> | Acetic acid hexyl ester         | 0.0077  | -0.9276     |
| interacts with | <i>Geotrichum</i>                       | Pyridine                        | 0.0048  | -0.9429     |
| interacts with | <i>Clavispora</i>                       | Pyridine                        | 0.0416  | -0.8286     |
| interacts with | <i>Apiotrichum</i>                      | Pyridine                        | 0.0048  | -0.9429     |
| interacts with | <i>unclassified_k_norank_d_Bacteria</i> | Pyridine                        | 0.0188  | -0.8857     |
| interacts with | <i>Pediococcus</i>                      | Pyridine                        | 0.0416  | 0.8286      |
| interacts with | <i>unclassified_f_Dipodascaceae</i>     | Pyridine                        | 0.0188  | -0.8857     |
| interacts with | <i>unclassified_f_Metschnikowiaceae</i> | Pyridine                        | 0.0416  | -0.8286     |
| interacts with | <i>Kodamaea</i>                         | Pyrazine                        | 0.0048  | 0.9429      |
| interacts with | <i>Issatchenkia</i>                     | Pyrazine                        | 0.0048  | 0.9429      |
| interacts with | <i>Candida</i>                          | Pyrazine                        | 0.0048  | 0.9429      |
| interacts with | <i>Kozakia</i>                          | Pyrazine                        | 0.0341  | 0.8452      |
| interacts with | <i>Acetobacter</i>                      | Pyrazine                        | 0.0003  | 0.9856      |
| interacts with | <i>Kosakonia</i>                        | Pyrazine                        | 0.0048  | -0.9429     |

| interaction    | Microorganism                             | Flavor compounds             | p_value | Correlation |
|----------------|-------------------------------------------|------------------------------|---------|-------------|
| interacts with | <i>Weissella</i>                          | Pyrazine                     | 0.0416  | -0.8286     |
| interacts with | <i>Millerozyma</i>                        | Pyrazine                     | 0.0077  | 0.9276      |
| interacts with | <i>Kodamaea</i>                           | 2-Methyl-pyrazine            | 0.0188  | 0.8857      |
| interacts with | <i>Issatchenkia</i>                       | 2-Methyl-pyrazine            | 0.0188  | 0.8857      |
| interacts with | <i>Candida</i>                            | 2-Methyl-pyrazine            | 0.0188  | 0.8857      |
| interacts with | <i>Kozakia</i>                            | 2-Methyl-pyrazine            | 0.0341  | 0.8452      |
| interacts with | <i>Acinetobacter</i>                      | 2-Methyl-pyrazine            | 0.0416  | -0.8286     |
| interacts with | <i>Acetobacter</i>                        | 2-Methyl-pyrazine            | 0.0077  | 0.9276      |
| interacts with | <i>Kosakonia</i>                          | 2-Methyl-pyrazine            | 0.0416  | -0.8286     |
| interacts with | <i>Millerozyma</i>                        | 2-Methyl-pyrazine            | 0.0499  | 0.8117      |
| interacts with | <i>unclassified_o__Saccharomycetales</i>  | 2-Methyl-pyrazine            | 0.0077  | 0.9276      |
| interacts with | <i>Acinetobacter</i>                      | 2,5-Dimethyl-pyrazine        | 0.0048  | -0.9429     |
| interacts with | <i>Kozakia</i>                            | 2-Ethyl-pyrazine             | 0.0290  | 0.8575      |
| interacts with | <i>unclassified_f__Enterobacteriaceae</i> | 2-Ethyl-pyrazine             | 0.0361  | -0.8407     |
| interacts with | <i>Acinetobacter</i>                      | 2-Ethyl-pyrazine             | 0.0003  | -0.9856     |
| interacts with | <i>Kosakonia</i>                          | 2-Ethyl-pyrazine             | 0.0499  | -0.8117     |
| interacts with | <i>Geotrichum</i>                         | 2,3-Dimethyl-pyrazine        | 0.0416  | -0.8286     |
| interacts with | <i>unclassified_o__Saccharomycetales</i>  | 2,3-Dimethyl-pyrazine        | 0.0077  | -0.9276     |
| interacts with | <i>unclassified_o__Saccharomycetales</i>  | 2,3,5-Trimethyl pyrazine     | 0.0499  | -0.8117     |
| interacts with | <i>Geotrichum</i>                         | 2,3-Dimethyl-5-ethylpyrazine | 0.0206  | -0.8804     |
| interacts with | <i>Clavispora</i>                         | 2,3-Dimethyl-5-ethylpyrazine | 0.0051  | -0.9411     |
| interacts with | <i>Apiotrichum</i>                        | 2,3-Dimethyl-5-ethylpyrazine | 0.0051  | -0.9411     |
| interacts with | <i>unclassified_k__norank_d__Bacteria</i> | 2,3-Dimethyl-5-ethylpyrazine | 0.0206  | -0.8804     |
| interacts with | <i>Pediococcus</i>                        | 2,3-Dimethyl-5-ethylpyrazine | 0.0051  | 0.9411      |
| interacts with | <i>unclassified_f__Dipodascaceae</i>      | 2,3-Dimethyl-5-ethylpyrazine | 0.0206  | -0.8804     |
| interacts with | <i>unclassified_f__Metschnikowiaceae</i>  | 2,3-Dimethyl-5-ethylpyrazine | 0.0051  | -0.9411     |
| interacts with | <i>Rhizopus</i>                           | 2-Pentyl-pyridine            | 0.0206  | -0.8804     |
| interacts with | <i>Geotrichum</i>                         | 1-(1H-Pyrrol-2-yl)-ethanone  | 0.0077  | 0.9276      |

| interaction    | Microorganism                            | Flavor compounds                                   | p_value | Correlation |
|----------------|------------------------------------------|----------------------------------------------------|---------|-------------|
| interacts with | <i>Kodamaea</i>                          | 1-(1H-Pyrrol-2-yl)-ethanone                        | 0.0361  | 0.8407      |
| interacts with | <i>Issatchenkia</i>                      | 1-(1H-Pyrrol-2-yl)-ethanone                        | 0.0361  | 0.8407      |
| interacts with | <i>Apiotrichum</i>                       | 1-(1H-Pyrrol-2-yl)-ethanone                        | 0.0003  | 0.9856      |
| interacts with | <i>Candida</i>                           | 1-(1H-Pyrrol-2-yl)-ethanone                        | 0.0361  | 0.8407      |
| interacts with | <i>unclassified_k_norank_d_Bacteria</i>  | 1-(1H-Pyrrol-2-yl)-ethanone                        | 0.0149  | 0.8986      |
| interacts with | <i>Pediococcus</i>                       | 1-(1H-Pyrrol-2-yl)-ethanone                        | 0.0077  | -0.9276     |
| interacts with | <i>unclassified_f_Dipodascaceae</i>      | 1-(1H-Pyrrol-2-yl)-ethanone                        | 0.0003  | 0.9856      |
| interacts with | <i>Geotrichum</i>                        | Benzothiazole                                      | 0.0206  | -0.8804     |
| interacts with | <i>Clavispora</i>                        | Benzothiazole                                      | 0.0051  | -0.9411     |
| interacts with | <i>Apiotrichum</i>                       | Benzothiazole                                      | 0.0051  | -0.9411     |
| interacts with | <i>unclassified_k_norank_d_Bacteria</i>  | Benzothiazole                                      | 0.0206  | -0.8804     |
| interacts with | <i>Pediococcus</i>                       | Benzothiazole                                      | 0.0051  | 0.9411      |
| interacts with | <i>unclassified_f_Dipodascaceae</i>      | Benzothiazole                                      | 0.0206  | -0.8804     |
| interacts with | <i>unclassified_f_Metschnikowiaceae</i>  | Benzothiazole                                      | 0.0051  | -0.9411     |
| interacts with | <i>unclassified_o_Saccharomycetales</i>  | Tetramethyl-pyrazine                               | 0.0077  | -0.9276     |
| interacts with | <i>unclassified_f_Enterobacteriaceae</i> | 2-Methoxy-phenol                                   | 0.0341  | 0.8452      |
| interacts with | <i>Kosakonia</i>                         | 2-Methoxy-phenol                                   | 0.0341  | 0.8452      |
| interacts with | <i>Staphylococcus</i>                    | Phenol                                             | 0.0051  | 0.9411      |
| interacts with | <i>Leuconostoc</i>                       | 3-Methyl-phenol                                    | 0.0206  | -0.8804     |
| interacts with | <i>unclassified_o_Saccharomycetales</i>  | p-Methyiphenol                                     | 0.0244  | -0.8697     |
| interacts with | <i>unclassified_f_Dipodascaceae</i>      | p-Methyiphenol                                     | 0.0416  | -0.8286     |
| interacts with | <i>Millerozyma</i>                       | 4-Allyl-2-methoxy-pheno                            | 0.0290  | 0.8575      |
| interacts with | <i>Clavispora</i>                        | 2-Nonene                                           | 0.0458  | -0.8197     |
| interacts with | <i>unclassified_f_Metschnikowiaceae</i>  | 2-Nonene                                           | 0.0458  | -0.8197     |
| interacts with | <i>Rhizopus</i>                          | Trans-4-decene                                     | 0.0077  | 0.9276      |
| interacts with | <i>Pseudomonas</i>                       | 4-Methylene-1-(1-methylethyl)-bicyclo[3.1.0]hexane | 0.0499  | -0.8117     |
| interacts with | <i>Rhodococcus</i>                       | 4-Methylene-1-(1-methylethyl)-bicyclo[3.1.0]hexane | 0.0499  | -0.8117     |
| interacts with | <i>Leuconostoc</i>                       | 4-Methylene-1-(1-methylethyl)-bicyclo[3.1.0]hexane | 0.0077  | -0.9276     |

| interaction    | Microorganism                            | Flavor compounds                            | p_value | Correlation |
|----------------|------------------------------------------|---------------------------------------------|---------|-------------|
| interacts with | <i>Apiotrichum</i>                       | 1-Undecene                                  | 0.0188  | -0.8857     |
| interacts with | <i>Kozakia</i>                           | 1-Undecene                                  | 0.0341  | -0.8452     |
| interacts with | <i>unclassified_f_Enterobacteriaceae</i> | 1-Undecene                                  | 0.0416  | 0.8286      |
| interacts with | <i>Pseudomonas</i>                       | 1-Undecene                                  | 0.0188  | -0.8857     |
| interacts with | <i>Rhodococcus</i>                       | 1-Undecene                                  | 0.0188  | -0.8857     |
| interacts with | <i>Acetobacter</i>                       | 1-Undecene                                  | 0.0499  | -0.8117     |
| interacts with | <i>Kosakonia</i>                         | 1-Undecene                                  | 0.0048  | 0.9429      |
| interacts with | <i>unclassified_k_norank_d_Bacteria</i>  | 1-Undecene                                  | 0.0048  | -0.9429     |
| interacts with | <i>Pediococcus</i>                       | 1-Undecene                                  | 0.0048  | 0.9429      |
| interacts with | <i>unclassified_o_Saccharomycetales</i>  | Heptanoic acid ethyl ester                  | 0.0244  | -0.8697     |
| interacts with | <i>unclassified_f_Dipodascaceae</i>      | Heptanoic acid ethyl ester                  | 0.0416  | -0.8286     |
| interacts with | <i>Pseudomonas</i>                       | 7-Methyl-3-methylene-1,6-octadiene          | 0.0499  | -0.8117     |
| interacts with | <i>Rhodococcus</i>                       | 7-Methyl-3-methylene-1,6-octadiene          | 0.0499  | -0.8117     |
| interacts with | <i>Leuconostoc</i>                       | 7-Methyl-3-methylene-1,6-octadiene          | 0.0077  | -0.9276     |
| interacts with | <i>Clavispora</i>                        | Limonene                                    | 0.0206  | -0.8804     |
| interacts with | <i>Apiotrichum</i>                       | Limonene                                    | 0.0206  | -0.8804     |
| interacts with | <i>Pseudomonas</i>                       | Limonene                                    | 0.0458  | -0.8197     |
| interacts with | <i>Rhodococcus</i>                       | Limonene                                    | 0.0458  | -0.8197     |
| interacts with | <i>Kosakonia</i>                         | Limonene                                    | 0.0206  | 0.8804      |
| interacts with | <i>unclassified_k_norank_d_Bacteria</i>  | Limonene                                    | 0.0051  | -0.9411     |
| interacts with | <i>Pediococcus</i>                       | Limonene                                    | 0.0206  | 0.8804      |
| interacts with | <i>unclassified_f_Metschnikowiaceae</i>  | Limonene                                    | 0.0206  | -0.8804     |
| interacts with | <i>Pseudomonas</i>                       | 3,7-Dimethyl-1,3,6-octatriene               | 0.0341  | -0.8452     |
| interacts with | <i>Rhodococcus</i>                       | 3,7-Dimethyl-1,3,6-octatriene               | 0.0341  | -0.8452     |
| interacts with | <i>Staphylococcus</i>                    | 3,7-Dimethyl-1,3,6-octatriene               | 0.0341  | 0.8452      |
| interacts with | <i>Leuconostoc</i>                       | 3,7-Dimethyl-1,3,6-octatriene               | 0.0341  | -0.8452     |
| interacts with | <i>unclassified_k_norank_d_Bacteria</i>  | 3,7-Dimethyl-1,3,6-octatriene               | 0.0341  | -0.8452     |
| interacts with | <i>Lactococcus</i>                       | 1-Methyl-4-(1-methylethylidene)-cyclohexene | 0.0188  | 0.8857      |

| interaction    | Microorganism                            | Flavor compounds                            | p_value | Correlation |
|----------------|------------------------------------------|---------------------------------------------|---------|-------------|
| interacts with | <i>Lactobacillus</i>                     | 1-Methyl-4-(1-methylethylidene)-cyclohexene | 0.0188  | 0.8857      |
| interacts with | <i>Apiotrichum</i>                       | 1-Tridecene                                 | 0.0188  | -0.8857     |
| interacts with | <i>Kozakia</i>                           | 1-Tridecene                                 | 0.0341  | -0.8452     |
| interacts with | <i>unclassified_f_Enterobacteriaceae</i> | 1-Tridecene                                 | 0.0416  | 0.8286      |
| interacts with | <i>Pseudomonas</i>                       | 1-Tridecene                                 | 0.0188  | -0.8857     |
| interacts with | <i>Rhodococcus</i>                       | 1-Tridecene                                 | 0.0188  | -0.8857     |
| interacts with | <i>Acetobacter</i>                       | 1-Tridecene                                 | 0.0499  | -0.8117     |
| interacts with | <i>Kosakonia</i>                         | 1-Tridecene                                 | 0.0048  | 0.9429      |
| interacts with | <i>unclassified_k_norank_d_Bacteria</i>  | 1-Tridecene                                 | 0.0048  | -0.9429     |
| interacts with | <i>Pediococcus</i>                       | 1-Tridecene                                 | 0.0048  | 0.9429      |
| interacts with | <i>Pseudomonas</i>                       | Copaene                                     | 0.0341  | -0.8452     |
| interacts with | <i>Rhodococcus</i>                       | Copaene                                     | 0.0341  | -0.8452     |
| interacts with | <i>Staphylococcus</i>                    | Copaene                                     | 0.0341  | 0.8452      |
| interacts with | <i>Leuconostoc</i>                       | Copaene                                     | 0.0341  | -0.8452     |
| interacts with | <i>unclassified_k_norank_d_Bacteria</i>  | Copaene                                     | 0.0341  | -0.8452     |
| interacts with | <i>Rhizopus</i>                          | $\beta$ -Caryophyllene                      | 0.0188  | -0.8857     |
| interacts with | <i>Acetobacter</i>                       | $\beta$ -Caryophyllene                      | 0.0499  | 0.8117      |
| interacts with | <i>Weissella</i>                         | $\beta$ -Caryophyllene                      | 0.0188  | -0.8857     |
| interacts with | <i>Millerozyma</i>                       | $\beta$ -Caryophyllene                      | 0.0077  | 0.9276      |
| interacts with | <i>Rhizopus</i>                          | $\alpha$ -Caryophyllene                     | 0.0416  | -0.8286     |
| interacts with | <i>norank_f_norank_o_Chloroplast</i>     | $\alpha$ -Caryophyllene                     | 0.0416  | -0.8286     |
| interacts with | <i>Millerozyma</i>                       | $\alpha$ -Caryophyllene                     | 0.0499  | 0.8117      |
| interacts with | <i>Clavispora</i>                        | (L)-Ethyl lactate                           | 0.0416  | -0.8286     |
| interacts with | <i>Kodamaea</i>                          | (L)-Ethyl lactate                           | 0.0416  | -0.8286     |
| interacts with | <i>Issatchenkia</i>                      | (L)-Ethyl lactate                           | 0.0416  | -0.8286     |
| interacts with | <i>Apiotrichum</i>                       | (L)-Ethyl lactate                           | 0.0048  | -0.9429     |
| interacts with | <i>Candida</i>                           | (L)-Ethyl lactate                           | 0.0416  | -0.8286     |
| interacts with | <i>Kozakia</i>                           | (L)-Ethyl lactate                           | 0.0341  | -0.8452     |

| interaction    | Microorganism                           | Flavor compounds                  | p_value | Correlation |
|----------------|-----------------------------------------|-----------------------------------|---------|-------------|
| interacts with | <i>Acetobacter</i>                      | (L)-Ethyl lactate                 | 0.0499  | -0.8117     |
| interacts with | <i>Kosakonia</i>                        | (L)-Ethyl lactate                 | 0.0416  | 0.8286      |
| interacts with | <i>unclassified_k_norank_d_Bacteria</i> | (L)-Ethyl lactate                 | 0.0188  | -0.8857     |
| interacts with | <i>Pediococcus</i>                      | (L)-Ethyl lactate                 | 0.0000  | 1.0000      |
| interacts with | <i>unclassified_f_Dipodascaceae</i>     | (L)-Ethyl lactate                 | 0.0188  | -0.8857     |
| interacts with | <i>unclassified_f_Metschnikowiaceae</i> | (L)-Ethyl lactate                 | 0.0416  | -0.8286     |
| interacts with | <i>Geotrichum</i>                       | (Z)-4-Tridecene                   | 0.0206  | -0.8804     |
| interacts with | <i>Clavispora</i>                       | (Z)-4-Tridecene                   | 0.0051  | -0.9411     |
| interacts with | <i>Apiotrichum</i>                      | (Z)-4-Tridecene                   | 0.0051  | -0.9411     |
| interacts with | <i>unclassified_k_norank_d_Bacteria</i> | (Z)-4-Tridecene                   | 0.0206  | -0.8804     |
| interacts with | <i>Pediococcus</i>                      | (Z)-4-Tridecene                   | 0.0051  | 0.9411      |
| interacts with | <i>unclassified_f_Dipodascaceae</i>     | (Z)-4-Tridecene                   | 0.0206  | -0.8804     |
| interacts with | <i>unclassified_f_Metschnikowiaceae</i> | (Z)-4-Tridecene                   | 0.0051  | -0.9411     |
| interacts with | <i>Clavispora</i>                       | 2,6,10,14-Tetramethyl-pentadecane | 0.0341  | -0.8452     |
| interacts with | <i>Apiotrichum</i>                      | 2,6,10,14-Tetramethyl-pentadecane | 0.0341  | -0.8452     |
| interacts with | <i>Pediococcus</i>                      | 2,6,10,14-Tetramethyl-pentadecane | 0.0341  | 0.8452      |
| interacts with | <i>unclassified_o_Saccharomycetales</i> | 2,6,10,14-Tetramethyl-pentadecane | 0.0441  | -0.8232     |
| interacts with | <i>unclassified_f_Metschnikowiaceae</i> | 2,6,10,14-Tetramethyl-pentadecane | 0.0341  | -0.8452     |
| interacts with | <i>Rhizopus</i>                         | Propanoic acid ethyl ester        | 0.0499  | -0.8117     |
| interacts with | <i>Saccharomycopsis</i>                 | Propanoic acid ethyl ester        | 0.0003  | 0.9856      |
| interacts with | <i>Pseudomonas</i>                      | Acetic acid heptyl ester          | 0.0341  | -0.8452     |
| interacts with | <i>Rhodococcus</i>                      | Acetic acid heptyl ester          | 0.0341  | -0.8452     |
| interacts with | <i>Staphylococcus</i>                   | Acetic acid heptyl ester          | 0.0341  | 0.8452      |
| interacts with | <i>Leuconostoc</i>                      | Acetic acid heptyl ester          | 0.0341  | -0.8452     |
| interacts with | <i>unclassified_k_norank_d_Bacteria</i> | Acetic acid heptyl ester          | 0.0341  | -0.8452     |
| interacts with | <i>unclassified_o_Saccharomycetales</i> | Octanoic acid ethyl ester         | 0.0003  | -0.9856     |
| interacts with | <i>Geotrichum</i>                       | Nonanoic acid ethyl ester         | 0.0188  | -0.8857     |
| interacts with | <i>Kodamaea</i>                         | Nonanoic acid ethyl ester         | 0.0048  | -0.9429     |

| interaction    | Microorganism                             | Flavor compounds               | p_value | Correlation |
|----------------|-------------------------------------------|--------------------------------|---------|-------------|
| interacts with | <i>Issatchenkia</i>                       | Nonanoic acid ethyl ester      | 0.0048  | -0.9429     |
| interacts with | <i>Apiotrichum</i>                        | Nonanoic acid ethyl ester      | 0.0416  | -0.8286     |
| interacts with | <i>Candida</i>                            | Nonanoic acid ethyl ester      | 0.0048  | -0.9429     |
| interacts with | <i>Acetobacter</i>                        | Nonanoic acid ethyl ester      | 0.0077  | -0.9276     |
| interacts with | <i>unclassified_f__Dipodascaceae</i>      | Nonanoic acid ethyl ester      | 0.0048  | -0.9429     |
| interacts with | <i>Millerozyma</i>                        | Nonanoic acid ethyl ester      | 0.0499  | -0.8117     |
| interacts with | <i>Wickerhamomyces</i>                    | Nonanoic acid ethyl ester      | 0.0416  | 0.8286      |
| interacts with | <i>Pseudomonas</i>                        | Bornyl acetate                 | 0.0341  | -0.8452     |
| interacts with | <i>Rhodococcus</i>                        | Bornyl acetate                 | 0.0341  | -0.8452     |
| interacts with | <i>Staphylococcus</i>                     | Bornyl acetate                 | 0.0341  | 0.8452      |
| interacts with | <i>Leuconostoc</i>                        | Bornyl acetate                 | 0.0341  | -0.8452     |
| interacts with | <i>unclassified_k__norank_d__Bacteria</i> | Bornyl acetate                 | 0.0341  | -0.8452     |
| interacts with | <i>Geotrichum</i>                         | Decanoic acid ethyl ester      | 0.0048  | -0.9429     |
| interacts with | <i>Kodamaea</i>                           | Decanoic acid ethyl ester      | 0.0188  | -0.8857     |
| interacts with | <i>Issatchenkia</i>                       | Decanoic acid ethyl ester      | 0.0188  | -0.8857     |
| interacts with | <i>Apiotrichum</i>                        | Decanoic acid ethyl ester      | 0.0048  | -0.9429     |
| interacts with | <i>Candida</i>                            | Decanoic acid ethyl ester      | 0.0188  | -0.8857     |
| interacts with | <i>Acetobacter</i>                        | Decanoic acid ethyl ester      | 0.0361  | -0.8407     |
| interacts with | <i>unclassified_k__norank_d__Bacteria</i> | Decanoic acid ethyl ester      | 0.0416  | -0.8286     |
| interacts with | <i>Pediococcus</i>                        | Decanoic acid ethyl ester      | 0.0188  | 0.8857      |
| interacts with | <i>unclassified_f__Dipodascaceae</i>      | Decanoic acid ethyl ester      | 0.0000  | -1.0000     |
| interacts with | <i>Geotrichum</i>                         | Butanedioic acid diethyl ester | 0.0077  | 0.9276      |
| interacts with | <i>Clavispora</i>                         | Butanedioic acid diethyl ester | 0.0077  | 0.9276      |
| interacts with | <i>Apiotrichum</i>                        | Butanedioic acid diethyl ester | 0.0499  | 0.8117      |
| interacts with | <i>unclassified_f__Dipodascaceae</i>      | Butanedioic acid diethyl ester | 0.0499  | 0.8117      |
| interacts with | <i>unclassified_f__Metschnikowiaceae</i>  | Butanedioic acid diethyl ester | 0.0077  | 0.9276      |
| interacts with | <i>Wickerhamomyces</i>                    | Butanedioic acid diethyl ester | 0.0149  | -0.8986     |
| interacts with | <i>Geotrichum</i>                         | Undecanoic acid ethyl ester    | 0.0149  | -0.8986     |



| interaction    | Microorganism                           | Flavor compounds                    | p_value | Correlation |
|----------------|-----------------------------------------|-------------------------------------|---------|-------------|
| interacts with | <i>Kodamaea</i>                         | Undecanoic acid ethyl ester         | 0.0077  | -0.9276     |
| interacts with | <i>Issatchenkia</i>                     | Undecanoic acid ethyl ester         | 0.0077  | -0.9276     |
| interacts with | <i>Apiotrichum</i>                      | Undecanoic acid ethyl ester         | 0.0077  | -0.9276     |
| interacts with | <i>Candida</i>                          | Undecanoic acid ethyl ester         | 0.0077  | -0.9276     |
| interacts with | <i>Kozakia</i>                          | Undecanoic acid ethyl ester         | 0.0441  | -0.8232     |
| interacts with | <i>Acetobacter</i>                      | Undecanoic acid ethyl ester         | 0.0199  | -0.8824     |
| interacts with | <i>unclassified_k_norank_d_Bacteria</i> | Undecanoic acid ethyl ester         | 0.0499  | -0.8117     |
| interacts with | <i>Pediococcus</i>                      | Undecanoic acid ethyl ester         | 0.0077  | 0.9276      |
| interacts with | <i>unclassified_f_Dipodascaceae</i>     | Undecanoic acid ethyl ester         | 0.0003  | -0.9856     |
| interacts with | <i>Kodamaea</i>                         | Dodecanoic acid ethyl ester         | 0.0000  | -1.0000     |
| interacts with | <i>Issatchenkia</i>                     | Dodecanoic acid ethyl ester         | 0.0000  | -1.0000     |
| interacts with | <i>Candida</i>                          | Dodecanoic acid ethyl ester         | 0.0000  | -1.0000     |
| interacts with | <i>Kozakia</i>                          | Dodecanoic acid ethyl ester         | 0.0341  | -0.8452     |
| interacts with | <i>Acetobacter</i>                      | Dodecanoic acid ethyl ester         | 0.0003  | -0.9856     |
| interacts with | <i>Kosakonia</i>                        | Dodecanoic acid ethyl ester         | 0.0416  | 0.8286      |
| interacts with | <i>Pediococcus</i>                      | Dodecanoic acid ethyl ester         | 0.0416  | 0.8286      |
| interacts with | <i>unclassified_f_Dipodascaceae</i>     | Dodecanoic acid ethyl ester         | 0.0188  | -0.8857     |
| interacts with | <i>Millerozyma</i>                      | Dodecanoic acid ethyl ester         | 0.0077  | -0.9276     |
| interacts with | <i>unclassified_o_Saccharomycetales</i> | Tetradecanoic acid ethyl ester      | 0.0499  | 0.8117      |
| interacts with | <i>Saccharomycopsis</i>                 | 2-Methyl-propanoic acid ethyl ester | 0.0051  | 0.9411      |
| interacts with | <i>Lactococcus</i>                      | 2-Methyl-propanoic acid ethyl ester | 0.0206  | 0.8804      |
| interacts with | <i>Weissella</i>                        | 2-Methyl-propanoic acid ethyl ester | 0.0458  | -0.8197     |
| interacts with | <i>Rhizopus</i>                         | Hexadecanoic acid ethyl ester       | 0.0188  | 0.8857      |
| interacts with | <i>unclassified_o_Saccharomycetales</i> | Hexadecanoic acid ethyl ester       | 0.0149  | 0.8986      |
| interacts with | <i>Clavispora</i>                       | 2-Butanol                           | 0.0341  | -0.8452     |
| interacts with | <i>Apiotrichum</i>                      | 2-Butanol                           | 0.0341  | -0.8452     |
| interacts with | <i>Pediococcus</i>                      | 2-Butanol                           | 0.0341  | 0.8452      |
| interacts with | <i>unclassified_o_Saccharomycetales</i> | 2-Butanol                           | 0.0441  | -0.8232     |

| interaction    | Microorganism                             | Flavor compounds                   | p_value | Correlation |
|----------------|-------------------------------------------|------------------------------------|---------|-------------|
| interacts with | <i>unclassified_f__Metschnikowiaceae</i>  | 2-Butanol                          | 0.0341  | -0.8452     |
| interacts with | <i>unclassified_o__Saccharomycetales</i>  | 2-Methyl-1-propanol                | 0.0077  | -0.9276     |
| interacts with | <i>Clavispora</i>                         | 2-Pentanol                         | 0.0341  | -0.8452     |
| interacts with | <i>Apiotrichum</i>                        | 2-Pentanol                         | 0.0341  | -0.8452     |
| interacts with | <i>Pediococcus</i>                        | 2-Pentanol                         | 0.0341  | 0.8452      |
| interacts with | <i>unclassified_o__Saccharomycetales</i>  | 2-Pentanol                         | 0.0441  | -0.8232     |
| interacts with | <i>unclassified_f__Metschnikowiaceae</i>  | 2-Pentanol                         | 0.0341  | -0.8452     |
| interacts with | <i>unclassified_o__Saccharomycetales</i>  | 1-Penten-3-ol                      | 0.0013  | -0.9706     |
| interacts with | <i>unclassified_o__Saccharomycetales</i>  | 3-Methyl-1-butanol                 | 0.0077  | -0.9276     |
| interacts with | <i>unclassified_o__Saccharomycetales</i>  | 2-Hexanol                          | 0.0013  | -0.9706     |
| interacts with | <i>Clavispora</i>                         | Acetic acid, 2-methyl-propyl ester | 0.0000  | -1.0000     |
| interacts with | <i>Pediococcus</i>                        | Acetic acid, 2-methyl-propyl ester | 0.0416  | 0.8286      |
| interacts with | <i>unclassified_f__Metschnikowiaceae</i>  | Acetic acid, 2-methyl-propyl ester | 0.0000  | -1.0000     |
| interacts with | <i>Rhizopus</i>                           | 1-Pentanol                         | 0.0048  | -0.9429     |
| interacts with | <i>unclassified_o__Saccharomycetales</i>  | 2-Heptanol                         | 0.0013  | -0.9706     |
| interacts with | <i>Geotrichum</i>                         | 3-Heptanol                         | 0.0499  | -0.8117     |
| interacts with | <i>Clavispora</i>                         | 3-Heptanol                         | 0.0361  | -0.8407     |
| interacts with | <i>Apiotrichum</i>                        | 3-Heptanol                         | 0.0361  | -0.8407     |
| interacts with | <i>unclassified_k__norank_d__Bacteria</i> | 3-Heptanol                         | 0.0149  | -0.8986     |
| interacts with | <i>unclassified_f__Metschnikowiaceae</i>  | 3-Heptanol                         | 0.0361  | -0.8407     |
| interacts with | <i>Apiotrichum</i>                        | 1-Hexanol                          | 0.0048  | -0.9429     |
| interacts with | <i>unclassified_k__norank_d__Bacteria</i> | 1-Hexanol                          | 0.0416  | -0.8286     |
| interacts with | <i>Pediococcus</i>                        | 1-Hexanol                          | 0.0188  | 0.8857      |
| interacts with | <i>unclassified_f__Dipodascaceae</i>      | 1-Hexanol                          | 0.0188  | -0.8857     |
| interacts with | <i>Clavispora</i>                         | (Z)-3-Hexen-1-ol                   | 0.0458  | -0.8197     |
| interacts with | <i>unclassified_f__Metschnikowiaceae</i>  | (Z)-3-Hexen-1-ol                   | 0.0458  | -0.8197     |
| interacts with | <i>Geotrichum</i>                         | 3-Octanol                          | 0.0048  | -0.9429     |
| interacts with | <i>Clavispora</i>                         | 3-Octanol                          | 0.0416  | -0.8286     |

| interaction    | Microorganism                            | Flavor compounds               | p_value | Correlation |
|----------------|------------------------------------------|--------------------------------|---------|-------------|
| interacts with | <i>Apiotrichum</i>                       | 3-Octanol                      | 0.0048  | -0.9429     |
| interacts with | <i>unclassified_k_norank_d_Bacteria</i>  | 3-Octanol                      | 0.0188  | -0.8857     |
| interacts with | <i>Pediococcus</i>                       | 3-Octanol                      | 0.0416  | 0.8286      |
| interacts with | <i>unclassified_f_Dipodascaceae</i>      | 3-Octanol                      | 0.0188  | -0.8857     |
| interacts with | <i>unclassified_f_Metschnikowiaceae</i>  | 3-Octanol                      | 0.0416  | -0.8286     |
| interacts with | <i>Clavispora</i>                        | 2-Ethylhexanol                 | 0.0416  | -0.8286     |
| interacts with | <i>unclassified_f_Metschnikowiaceae</i>  | 2-Ethylhexanol                 | 0.0416  | -0.8286     |
| interacts with | <i>Acinetobacter</i>                     | 2,3-Butanediol                 | 0.0416  | 0.8286      |
| interacts with | <i>Rhizopus</i>                          | Butanoic acid ethyl ester      | 0.0188  | -0.8857     |
| interacts with | <i>unclassified_f_Enterobacteriaceae</i> | 3,7-Dimethyl-1,6-octadien-3-ol | 0.0499  | 0.8117      |
| interacts with | <i>Geotrichum</i>                        | 1-Octanol                      | 0.0416  | -0.8286     |
| interacts with | <i>Kodamaea</i>                          | 1-Octanol                      | 0.0048  | -0.9429     |
| interacts with | <i>Issatchenkia</i>                      | 1-Octanol                      | 0.0048  | -0.9429     |
| interacts with | <i>Apiotrichum</i>                       | 1-Octanol                      | 0.0188  | -0.8857     |
| interacts with | <i>Candida</i>                           | 1-Octanol                      | 0.0048  | -0.9429     |
| interacts with | <i>Kozakia</i>                           | 1-Octanol                      | 0.0341  | -0.8452     |
| interacts with | <i>Acetobacter</i>                       | 1-Octanol                      | 0.0149  | -0.8986     |
| interacts with | <i>Pediococcus</i>                       | 1-Octanol                      | 0.0048  | 0.9429      |
| interacts with | <i>unclassified_f_Dipodascaceae</i>      | 1-Octanol                      | 0.0048  | -0.9429     |
| interacts with | <i>Millerozyma</i>                       | 1-Octanol                      | 0.0361  | -0.8407     |
| interacts with | <i>unclassified_o_Saccharomycetales</i>  | Fenchyl alcohol                | 0.0084  | -0.9241     |
| interacts with | <i>Geotrichum</i>                        | Propylene glycol               | 0.0341  | -0.8452     |
| interacts with | <i>unclassified_o_Saccharomycetales</i>  | Propylene glycol               | 0.0441  | -0.8232     |
| interacts with | <i>unclassified_f_Dipodascaceae</i>      | Propylene glycol               | 0.0341  | -0.8452     |
| interacts with | <i>Kodamaea</i>                          | (E)-2-Octen-1-ol               | 0.0000  | -1.0000     |
| interacts with | <i>Issatchenkia</i>                      | (E)-2-Octen-1-ol               | 0.0000  | -1.0000     |
| interacts with | <i>Candida</i>                           | (E)-2-Octen-1-ol               | 0.0000  | -1.0000     |
| interacts with | <i>Kozakia</i>                           | (E)-2-Octen-1-ol               | 0.0341  | -0.8452     |

| interaction    | Microorganism                             | Flavor compounds | p_value | Correlation |
|----------------|-------------------------------------------|------------------|---------|-------------|
| interacts with | <i>Acetobacter</i>                        | (E)-2-Octen-1-ol | 0.0003  | -0.9856     |
| interacts with | <i>Kosakonia</i>                          | (E)-2-Octen-1-ol | 0.0416  | 0.8286      |
| interacts with | <i>Pediococcus</i>                        | (E)-2-Octen-1-ol | 0.0416  | 0.8286      |
| interacts with | <i>unclassified_f__Dipodascaceae</i>      | (E)-2-Octen-1-ol | 0.0188  | -0.8857     |
| interacts with | <i>Millerozyma</i>                        | (E)-2-Octen-1-ol | 0.0077  | -0.9276     |
| interacts with | <i>Clavispora</i>                         | 1-Nonanol        | 0.0416  | -0.8286     |
| interacts with | <i>Kodamaea</i>                           | 1-Nonanol        | 0.0416  | -0.8286     |
| interacts with | <i>Issatchenkia</i>                       | 1-Nonanol        | 0.0416  | -0.8286     |
| interacts with | <i>Apiotrichum</i>                        | 1-Nonanol        | 0.0048  | -0.9429     |
| interacts with | <i>Candida</i>                            | 1-Nonanol        | 0.0416  | -0.8286     |
| interacts with | <i>Kozakia</i>                            | 1-Nonanol        | 0.0341  | -0.8452     |
| interacts with | <i>Acetobacter</i>                        | 1-Nonanol        | 0.0499  | -0.8117     |
| interacts with | <i>Kosakonia</i>                          | 1-Nonanol        | 0.0416  | 0.8286      |
| interacts with | <i>unclassified_k__norank_d__Bacteria</i> | 1-Nonanol        | 0.0188  | -0.8857     |
| interacts with | <i>Pediococcus</i>                        | 1-Nonanol        | 0.0000  | 1.0000      |
| interacts with | <i>unclassified_f__Dipodascaceae</i>      | 1-Nonanol        | 0.0188  | -0.8857     |
| interacts with | <i>unclassified_f__Metschnikowiaceae</i>  | 1-Nonanol        | 0.0416  | -0.8286     |
| interacts with | <i>Geotrichum</i>                         | 2-Nonen-1-ol     | 0.0188  | -0.8857     |
| interacts with | <i>Apiotrichum</i>                        | 2-Nonen-1-ol     | 0.0000  | -1.0000     |
| interacts with | <i>Pseudomonas</i>                        | 2-Nonen-1-ol     | 0.0416  | -0.8286     |
| interacts with | <i>Rhodococcus</i>                        | 2-Nonen-1-ol     | 0.0416  | -0.8286     |
| interacts with | <i>unclassified_k__norank_d__Bacteria</i> | 2-Nonen-1-ol     | 0.0048  | -0.9429     |
| interacts with | <i>Pediococcus</i>                        | 2-Nonen-1-ol     | 0.0048  | 0.9429      |
| interacts with | <i>unclassified_f__Dipodascaceae</i>      | 2-Nonen-1-ol     | 0.0048  | -0.9429     |
| interacts with | <i>Pseudomonas</i>                        | 2-Undecanol      | 0.0341  | -0.8452     |
| interacts with | <i>Rhodococcus</i>                        | 2-Undecanol      | 0.0341  | -0.8452     |
| interacts with | <i>Staphylococcus</i>                     | 2-Undecanol      | 0.0341  | 0.8452      |
| interacts with | <i>Leuconostoc</i>                        | 2-Undecanol      | 0.0341  | -0.8452     |

| interaction    | Microorganism                           | Flavor compounds                   | p_value | Correlation |
|----------------|-----------------------------------------|------------------------------------|---------|-------------|
| interacts with | <i>unclassified_k_norank_d_Bacteria</i> | 2-Undecanol                        | 0.0341  | -0.8452     |
| interacts with | <i>Geotrichum</i>                       | 1-Decanol                          | 0.0206  | -0.8804     |
| interacts with | <i>Clavispora</i>                       | 1-Decanol                          | 0.0051  | -0.9411     |
| interacts with | <i>Apiotrichum</i>                      | 1-Decanol                          | 0.0051  | -0.9411     |
| interacts with | <i>unclassified_k_norank_d_Bacteria</i> | 1-Decanol                          | 0.0206  | -0.8804     |
| interacts with | <i>Pediococcus</i>                      | 1-Decanol                          | 0.0051  | 0.9411      |
| interacts with | <i>unclassified_f_Dipodascaceae</i>     | 1-Decanol                          | 0.0206  | -0.8804     |
| interacts with | <i>unclassified_f_Metschnikowiaceae</i> | 1-Decanol                          | 0.0051  | -0.9411     |
| interacts with | <i>Leuconostoc</i>                      | 1-Dodecanol                        | 0.0198  | -0.8827     |
| interacts with | <i>unclassified_o_Saccharomycetales</i> | Isoborneol                         | 0.0084  | -0.9241     |
| interacts with | <i>Saccharomycopsis</i>                 | Acetic acid                        | 0.0000  | 1.0000      |
| interacts with | <i>Geotrichum</i>                       | Formic acid                        | 0.0206  | -0.8804     |
| interacts with | <i>Clavispora</i>                       | Formic acid                        | 0.0051  | -0.9411     |
| interacts with | <i>Apiotrichum</i>                      | Formic acid                        | 0.0051  | -0.9411     |
| interacts with | <i>unclassified_k_norank_d_Bacteria</i> | Formic acid                        | 0.0206  | -0.8804     |
| interacts with | <i>Pediococcus</i>                      | Formic acid                        | 0.0051  | 0.9411      |
| interacts with | <i>unclassified_f_Dipodascaceae</i>     | Formic acid                        | 0.0206  | -0.8804     |
| interacts with | <i>unclassified_f_Metschnikowiaceae</i> | Formic acid                        | 0.0051  | -0.9411     |
| interacts with | <i>Clavispora</i>                       | 2-Methyl-propanoic acid            | 0.0188  | 0.8857      |
| interacts with | <i>unclassified_f_Metschnikowiaceae</i> | 2-Methyl-propanoic acid            | 0.0188  | 0.8857      |
| interacts with | <i>Rhizopus</i>                         | 3-Methyl-butanoic acid ethyl ester | 0.0188  | -0.8857     |
| interacts with | <i>Saccharomycopsis</i>                 | 3-Methyl-butanoic acid ethyl ester | 0.0048  | 0.9429      |
| interacts with | <i>Staphylococcus</i>                   | 2-Methyl-pentanoic acid            | 0.0149  | -0.8986     |
| interacts with | <i>norank_f_norank_o_Chloroplast</i>    | 2-Methyl-pentanoic acid            | 0.0244  | 0.8697      |
| interacts with | <i>Geotrichum</i>                       | Hexanoic acid                      | 0.0416  | -0.8286     |
| interacts with | <i>Apiotrichum</i>                      | Hexanoic acid                      | 0.0188  | -0.8857     |
| interacts with | <i>Pediococcus</i>                      | Hexanoic acid                      | 0.0416  | 0.8286      |
| interacts with | <i>unclassified_f_Dipodascaceae</i>     | Hexanoic acid                      | 0.0048  | -0.9429     |

| interaction    | Microorganism                            | Flavor compounds       | p_value | Correlation |
|----------------|------------------------------------------|------------------------|---------|-------------|
| interacts with | <i>unclassified_o__Saccharomycetales</i> | Heptanoic acid         | 0.0244  | -0.8697     |
| interacts with | <i>unclassified_f__Dipodascaceae</i>     | Heptanoic acid         | 0.0416  | -0.8286     |
| interacts with | <i>Geotrichum</i>                        | Octanoic acid          | 0.0416  | -0.8286     |
| interacts with | <i>Apiotrichum</i>                       | Octanoic acid          | 0.0188  | -0.8857     |
| interacts with | <i>Pediococcus</i>                       | Octanoic acid          | 0.0416  | 0.8286      |
| interacts with | <i>unclassified_f__Dipodascaceae</i>     | Octanoic acid          | 0.0048  | -0.9429     |
| interacts with | <i>Geotrichum</i>                        | Nonanoic acid          | 0.0206  | -0.8804     |
| interacts with | <i>Kodamaea</i>                          | Nonanoic acid          | 0.0051  | -0.9411     |
| interacts with | <i>Issatchenkia</i>                      | Nonanoic acid          | 0.0051  | -0.9411     |
| interacts with | <i>Candida</i>                           | Nonanoic acid          | 0.0051  | -0.9411     |
| interacts with | <i>Acetobacter</i>                       | Nonanoic acid          | 0.0084  | -0.9241     |
| interacts with | <i>Weissella</i>                         | Nonanoic acid          | 0.0206  | 0.8804      |
| interacts with | <i>unclassified_f__Dipodascaceae</i>     | Nonanoic acid          | 0.0206  | -0.8804     |
| interacts with | <i>Millerozyma</i>                       | Nonanoic acid          | 0.0084  | -0.9241     |
| interacts with | <i>Wickerhamomyces</i>                   | Nonanoic acid          | 0.0051  | 0.9411      |
| interacts with | <i>Kozakia</i>                           | Hexanal                | 0.0341  | 0.8452      |
| interacts with | <i>Acetobacter</i>                       | (E)-2-Methyl-2-butenal | 0.0499  | 0.8117      |
| interacts with | <i>Weissella</i>                         | (E)-2-Methyl-2-butenal | 0.0000  | -1.0000     |
| interacts with | <i>Millerozyma</i>                       | (E)-2-Methyl-2-butenal | 0.0077  | 0.9276      |
| interacts with | <i>Wickerhamomyces</i>                   | (E)-2-Methyl-2-butenal | 0.0188  | -0.8857     |
| interacts with | <i>Rhizopus</i>                          | Nonanal                | 0.0416  | 0.8286      |
| interacts with | <i>Geotrichum</i>                        | (E)-2-Octenal          | 0.0003  | -0.9856     |
| interacts with | <i>Clavispora</i>                        | (E)-2-Octenal          | 0.0361  | -0.8407     |
| interacts with | <i>Apiotrichum</i>                       | (E)-2-Octenal          | 0.0361  | -0.8407     |
| interacts with | <i>unclassified_f__Dipodascaceae</i>     | (E)-2-Octenal          | 0.0149  | -0.8986     |
| interacts with | <i>unclassified_f__Metschnikowiaceae</i> | (E)-2-Octenal          | 0.0361  | -0.8407     |
| interacts with | <i>Wickerhamomyces</i>                   | (E)-2-Octenal          | 0.0077  | 0.9276      |
| interacts with | <i>Kozakia</i>                           | 5-Methyl-2-furaldehyde | 0.0427  | 0.8262      |

| interaction    | Microorganism                            | Flavor compounds           | p_value | Correlation |
|----------------|------------------------------------------|----------------------------|---------|-------------|
| interacts with | <i>Rhizopus</i>                          | Hendecanaldehyde           | 0.0341  | 0.8452      |
| interacts with | <i>unclassified_o__Saccharomycetales</i> | Hendecanaldehyde           | 0.0290  | 0.8575      |
| interacts with | <i>Clavispora</i>                        | (E)-2-Decenal              | 0.0198  | -0.8827     |
| interacts with | <i>unclassified_f__Metschnikowiaceae</i> | (E)-2-Decenal              | 0.0198  | -0.8827     |
| interacts with | <i>Kodamaea</i>                          | 2-Octenal, 2-butyl-        | 0.0048  | 0.9429      |
| interacts with | <i>Issatchenkia</i>                      | 2-Octenal, 2-butyl-        | 0.0048  | 0.9429      |
| interacts with | <i>Candida</i>                           | 2-Octenal, 2-butyl-        | 0.0048  | 0.9429      |
| interacts with | <i>Acetobacter</i>                       | 2-Octenal, 2-butyl-        | 0.0077  | 0.9276      |
| interacts with | <i>Weissella</i>                         | 2-Octenal, 2-butyl-        | 0.0188  | -0.8857     |
| interacts with | <i>Millerozyma</i>                       | 2-Octenal, 2-butyl-        | 0.0003  | 0.9856      |
| interacts with | <i>Wickerhamomyces</i>                   | 2-Octenal, 2-butyl-        | 0.0416  | -0.8286     |
| interacts with | <i>Lactococcus</i>                       | Decyl aldehyde             | 0.0198  | -0.8827     |
| interacts with | <i>Weissella</i>                         | Decyl aldehyde             | 0.0112  | 0.9122      |
| interacts with | <i>Millerozyma</i>                       | Decyl aldehyde             | 0.0081  | -0.9255     |
| interacts with | <i>Geotrichum</i>                        | 2-Pentanone                | 0.0188  | -0.8857     |
| interacts with | <i>Apiotrichum</i>                       | 2-Pentanone                | 0.0416  | -0.8286     |
| interacts with | <i>unclassified_o__Saccharomycetales</i> | 2-Pentanone                | 0.0499  | -0.8117     |
| interacts with | <i>unclassified_o__Saccharomycetales</i> | 3-Methyl-1-butanol acetate | 0.0077  | -0.9276     |
| interacts with | <i>Acinetobacter</i>                     | (E)-3-Penten-2-one         | 0.0416  | -0.8286     |
| interacts with | <i>Apiotrichum</i>                       | 4-Methyl-3-penten-2-one    | 0.0458  | -0.8197     |
| interacts with | <i>Pediococcus</i>                       | 4-Methyl-3-penten-2-one    | 0.0458  | 0.8197      |
| interacts with | <i>unclassified_o__Saccharomycetales</i> | 3-Octanone                 | 0.0077  | -0.9276     |
| interacts with | <i>Apiotrichum</i>                       | 3-Hydroxy-2-oxobutane      | 0.0416  | 0.8286      |
| interacts with | <i>Pseudomonas</i>                       | 3-Hydroxy-2-oxobutane      | 0.0416  | 0.8286      |
| interacts with | <i>Rhodococcus</i>                       | 3-Hydroxy-2-oxobutane      | 0.0416  | 0.8286      |
| interacts with | <i>unclassified_o__Saccharomycetales</i> | 2-Octanone                 | 0.0077  | -0.9276     |
| interacts with | <i>Geotrichum</i>                        | 6-Methyl-5-hepten-2-one    | 0.0416  | -0.8286     |
| interacts with | <i>Clavispora</i>                        | 6-Methyl-5-hepten-2-one    | 0.0416  | -0.8286     |

| interaction    | Microorganism                            | Flavor compounds        | p_value | Correlation |
|----------------|------------------------------------------|-------------------------|---------|-------------|
| interacts with | <i>unclassified_f__Metschnikowiaceae</i> | 6-Methyl-5-hepten-2-one | 0.0416  | -0.8286     |
| interacts with | <i>Apiotrichum</i>                       | 5-Decanone              | 0.0499  | -0.8117     |
| interacts with | <i>Pediococcus</i>                       | 5-Decanone              | 0.0149  | 0.8986      |
| interacts with | <i>Leuconostoc</i>                       | 3-Nonanone              | 0.0206  | -0.8804     |

**Table S3.** The relationship between flavor compounds (VIP > 1) and dominant microbial genera

| interaction    | Microorganism                            | Flavor compounds                    | p_value  | Correlation |
|----------------|------------------------------------------|-------------------------------------|----------|-------------|
| interacts with | <i>Saccharomycopsis</i>                  | Acetic acid                         | 0        | 1           |
| interacts with | <i>Saccharomycopsis</i>                  | Propanoic acid ethyl ester          | 3.00E-04 | 0.9856      |
| interacts with | <i>Apiotrichum</i>                       | 1-(1H-Pyrrol-2-yl)-ethanone         | 3.00E-04 | 0.9856      |
| interacts with | <i>unclassified_f__Dipodascaceae</i>     | 1-(1H-Pyrrol-2-yl)-ethanone         | 3.00E-04 | 0.9856      |
| interacts with | <i>Acetobacter</i>                       | Pyrazine                            | 3.00E-04 | 0.9856      |
| interacts with | <i>Saccharomycopsis</i>                  | 3-Methyl-butanoic acid ethyl ester  | 0.0048   | 0.9429      |
| interacts with | <i>Candida</i>                           | Pyrazine                            | 0.0048   | 0.9429      |
| interacts with | <i>Issatchenkia</i>                      | Pyrazine                            | 0.0048   | 0.9429      |
| interacts with | <i>Kodamaea</i>                          | Pyrazine                            | 0.0048   | 0.9429      |
| interacts with | <i>Clavispora</i>                        | 2-Furanmethanol                     | 0.0048   | 0.9429      |
| interacts with | <i>unclassified_f__Metschnikowiaceae</i> | 2-Furanmethanol                     | 0.0048   | 0.9429      |
| interacts with | <i>Saccharomycopsis</i>                  | 2-Methyl-propanoic acid ethyl ester | 0.0051   | 0.9411      |
| interacts with | <i>Kosakonia</i>                         | (-)- $\alpha$ -Thujone              | 0.0051   | 0.9411      |
| interacts with | <i>Rhizopus</i>                          | Trans-4-decene                      | 0.0077   | 0.9276      |
| interacts with | <i>Clavispora</i>                        | Butanedioic acid diethyl ester      | 0.0077   | 0.9276      |
| interacts with | <i>Geotrichum</i>                        | Butanedioic acid diethyl ester      | 0.0077   | 0.9276      |
| interacts with | <i>Geotrichum</i>                        | 1-(1H-Pyrrol-2-yl)-ethanone         | 0.0077   | 0.9276      |
| interacts with | <i>Millerozyma</i>                       | (E)-2-Methyl-2-butenal              | 0.0077   | 0.9276      |
| interacts with | <i>Millerozyma</i>                       | Pyrazine                            | 0.0077   | 0.9276      |



| interaction    | Microorganism                            | Flavor compounds                    | p_value | Correlation |
|----------------|------------------------------------------|-------------------------------------|---------|-------------|
| interacts with | <i>Millerozyma</i>                       | $\beta$ -Caryophyllene              | 0.0077  | 0.9276      |
| interacts with | <i>unclassified_f_Metschnikowiaceae</i>  | Butanedioic acid diethyl ester      | 0.0077  | 0.9276      |
| interacts with | <i>unclassified_o_Saccharomycetales</i>  | 3-Methyl-pyridine                   | 0.0077  | 0.9276      |
| interacts with | <i>Acetobacter</i>                       | 2-Methyl-pyrazine                   | 0.0077  | 0.9276      |
| interacts with | <i>Weissella</i>                         | Decyl aldehyde                      | 0.0112  | 0.9122      |
| interacts with | <i>unclassified_k_norank_d_Bacteria</i>  | 1-(1H-Pyrrol-2-yl)-ethanone         | 0.0149  | 0.8986      |
| interacts with | <i>Lactobacillus</i>                     | 2-Methyl-naphthalene                | 0.0149  | 0.8986      |
| interacts with | <i>Kosakonia</i>                         | 6-Methyl-3,5-heptadiene-2-one       | 0.0149  | 0.8986      |
| interacts with | <i>unclassified_f_Enterobacteriaceae</i> | 6-Methyl-3,5-heptadiene-2-one       | 0.0149  | 0.8986      |
| interacts with | <i>Candida</i>                           | 2-Methyl-pyrazine                   | 0.0188  | 0.8857      |
| interacts with | <i>Issatchenkia</i>                      | 2-Methyl-pyrazine                   | 0.0188  | 0.8857      |
| interacts with | <i>Kodamaea</i>                          | 2-Methyl-pyrazine                   | 0.0188  | 0.8857      |
| interacts with | <i>Clavispora</i>                        | 2-Methyl-propanoic acid             | 0.0188  | 0.8857      |
| interacts with | <i>Geotrichum</i>                        | 2-Furanmethanol                     | 0.0188  | 0.8857      |
| interacts with | <i>unclassified_f_Metschnikowiaceae</i>  | 2-Methyl-propanoic acid             | 0.0188  | 0.8857      |
| interacts with | <i>Weissella</i>                         | 2-Nonanone                          | 0.0188  | 0.8857      |
| interacts with | <i>Weissella</i>                         | Dihydro-5-pentyl-2(3H)-furanone     | 0.0188  | 0.8857      |
| interacts with | <i>Pediococcus</i>                       | Benzyl alcohol                      | 0.0188  | 0.8857      |
| interacts with | <i>Lactobacillus</i>                     | 1-Methyl-naphthalene                | 0.0188  | 0.8857      |
| interacts with | <i>Saccharomycopsis</i>                  | 2-Pentyl-furan                      | 0.0206  | 0.8804      |
| interacts with | <i>Weissella</i>                         | (-)- $\alpha$ -Thujone              | 0.0206  | 0.8804      |
| interacts with | <i>Leuconostoc</i>                       | Furfural                            | 0.0206  | 0.8804      |
| interacts with | <i>Lactococcus</i>                       | 2-Methyl-propanoic acid ethyl ester | 0.0206  | 0.8804      |
| interacts with | <i>norank_f_norank_o_Chloroplast</i>     | 2-Methyl-pentanoic acid             | 0.0244  | 0.8697      |
| interacts with | <i>Acinetobacter</i>                     | Pantolactone                        | 0.0244  | 0.8697      |
| interacts with | <i>Millerozyma</i>                       | 4-Allyl-2-methoxy-pheno             | 0.029   | 0.8575      |
| interacts with | <i>unclassified_o_Saccharomycetales</i>  | Hendecanaldehyde                    | 0.029   | 0.8575      |
| interacts with | <i>Kozakia</i>                           | 2-Ethyl-pyrazine                    | 0.029   | 0.8575      |

| interaction    | Microorganism                            | Flavor compounds                | p_value | Correlation |
|----------------|------------------------------------------|---------------------------------|---------|-------------|
| interacts with | <i>Rhizopus</i>                          | Hendecanaldehyde                | 0.0341  | 0.8452      |
| interacts with | <i>Kosakonia</i>                         | 2-Methoxy-phenol                | 0.0341  | 0.8452      |
| interacts with | <i>unclassified_f_Enterobacteriaceae</i> | 2-Methoxy-phenol                | 0.0341  | 0.8452      |
| interacts with | <i>Kozakia</i>                           | Hexanal                         | 0.0341  | 0.8452      |
| interacts with | <i>Kozakia</i>                           | Pyrazine                        | 0.0341  | 0.8452      |
| interacts with | <i>Kozakia</i>                           | 2-Methyl-pyrazine               | 0.0341  | 0.8452      |
| interacts with | <i>Candida</i>                           | 1-(1H-Pyrrol-2-yl)-ethanone     | 0.0361  | 0.8407      |
| interacts with | <i>Issatchenkia</i>                      | 1-(1H-Pyrrol-2-yl)-ethanone     | 0.0361  | 0.8407      |
| interacts with | <i>Kodamaea</i>                          | 1-(1H-Pyrrol-2-yl)-ethanone     | 0.0361  | 0.8407      |
| interacts with | <i>Millerozyma</i>                       | 2-Pentyl-furan                  | 0.0401  | 0.8317      |
| interacts with | <i>Wickerhamomyces</i>                   | Nonanoic acid ethyl ester       | 0.0416  | 0.8286      |
| interacts with | <i>Wickerhamomyces</i>                   | 2-Nonanone                      | 0.0416  | 0.8286      |
| interacts with | <i>Wickerhamomyces</i>                   | Dihydro-5-pentyl-2(3H)-furanone | 0.0416  | 0.8286      |
| interacts with | <i>Saccharomycopsis</i>                  | Pentanoic acid ethyl ester      | 0.0416  | 0.8286      |
| interacts with | <i>Rhizopus</i>                          | Nonanal                         | 0.0416  | 0.8286      |
| interacts with | <i>Apiotrichum</i>                       | 3-Hydroxy-2-oxobutane           | 0.0416  | 0.8286      |
| interacts with | <i>Apiotrichum</i>                       | 2-Furanmethanol                 | 0.0416  | 0.8286      |
| interacts with | <i>Pediococcus</i>                       | Octanoic acid                   | 0.0416  | 0.8286      |
| interacts with | <i>Lactobacillus</i>                     | Naphthalene                     | 0.0416  | 0.8286      |
| interacts with | <i>Lactococcus</i>                       | 1-Methyl-naphthalene            | 0.0416  | 0.8286      |
| interacts with | <i>norank_f_norank_o_Chloroplast</i>     | 5-Ethyl-dihydro-2(3H)-furanone  | 0.0416  | 0.8286      |
| interacts with | <i>Rhodococcus</i>                       | 3-Hydroxy-2-oxobutane           | 0.0416  | 0.8286      |
| interacts with | <i>Acinetobacter</i>                     | 2,3-Butanediol                  | 0.0416  | 0.8286      |
| interacts with | <i>Pseudomonas</i>                       | 3-Hydroxy-2-oxobutane           | 0.0416  | 0.8286      |
| interacts with | <i>Kozakia</i>                           | 5-Methyl-2-furaldehyde          | 0.0427  | 0.8262      |
| interacts with | <i>Millerozyma</i>                       | Acetic acid 2-phenylethyl ester | 0.044   | 0.8235      |
| interacts with | <i>unclassified_f_Enterobacteriaceae</i> | (-)- $\alpha$ -Thujone          | 0.0458  | 0.8197      |
| interacts with | <i>Apiotrichum</i>                       | Butanedioic acid diethyl ester  | 0.0499  | 0.8117      |

| interaction    | Microorganism                            | Flavor compounds                    | p_value | Correlation |
|----------------|------------------------------------------|-------------------------------------|---------|-------------|
| interacts with | <i>Millerozyma</i>                       | Naphthalene                         | 0.0499  | 0.8117      |
| interacts with | <i>Millerozyma</i>                       | 2-Methyl-pyrazine                   | 0.0499  | 0.8117      |
| interacts with | <i>Millerozyma</i>                       | $\alpha$ -Caryophyllene             | 0.0499  | 0.8117      |
| interacts with | <i>unclassified_f_Dipodascaceae</i>      | Butanedioic acid diethyl ester      | 0.0499  | 0.8117      |
| interacts with | <i>unclassified_o_Saccharomycetales</i>  | Tetradecanoic acid ethyl ester      | 0.0499  | 0.8117      |
| interacts with | <i>Acetobacter</i>                       | (E)-2-Methyl-2-butenal              | 0.0499  | 0.8117      |
| interacts with | <i>Acetobacter</i>                       | $\beta$ -Caryophyllene              | 0.0499  | 0.8117      |
| interacts with | <i>Acinetobacter</i>                     | Tetrahydro-6-methyl-2H-pyran-2-one  | 0.0499  | 0.8117      |
| interacts with | <i>unclassified_f_Enterobacteriaceae</i> | 3,7-Dimethyl-1,6-octadiene-3-ol     | 0.0499  | 0.8117      |
| interacts with | <i>Rhizopus</i>                          | Propanoic acid ethyl ester          | 0.0499  | -0.8117     |
| interacts with | <i>Apiotrichum</i>                       | 6-Methyl-3,5-heptadiene-2-one       | 0.0499  | -0.8117     |
| interacts with | <i>Millerozyma</i>                       | Nonanoic acid ethyl ester           | 0.0499  | -0.8117     |
| interacts with | <i>Kosakonia</i>                         | 2-Ethyl-pyrazine                    | 0.0499  | -0.8117     |
| interacts with | <i>Weissella</i>                         | 2-Methyl-propanoic acid ethyl ester | 0.0458  | -0.8197     |
| interacts with | <i>Kozakia</i>                           | Pantolactone                        | 0.0441  | -0.8232     |
| interacts with | <i>Wickerhamomyces</i>                   | 2-Furanmethanol                     | 0.0416  | -0.8286     |
| interacts with | <i>Rhizopus</i>                          | $\alpha$ -Caryophyllene             | 0.0416  | -0.8286     |
| interacts with | <i>Candida</i>                           | Benzyl alcohol                      | 0.0416  | -0.8286     |
| interacts with | <i>Apiotrichum</i>                       | Nonanoic acid ethyl ester           | 0.0416  | -0.8286     |
| interacts with | <i>Apiotrichum</i>                       | Benzyl alcohol                      | 0.0416  | -0.8286     |
| interacts with | <i>Issatchenkia</i>                      | Benzyl alcohol                      | 0.0416  | -0.8286     |
| interacts with | <i>Kodamaea</i>                          | Benzyl alcohol                      | 0.0416  | -0.8286     |
| interacts with | <i>Geotrichum</i>                        | Octanoic acid                       | 0.0416  | -0.8286     |
| interacts with | <i>unclassified_f_Dipodascaceae</i>      | Heptanoic acid ethyl ester          | 0.0416  | -0.8286     |
| interacts with | <i>unclassified_f_Dipodascaceae</i>      | Heptanoic acid                      | 0.0416  | -0.8286     |
| interacts with | <i>unclassified_f_Dipodascaceae</i>      | Dihydro-5-propyl-2(3H)-furanone     | 0.0416  | -0.8286     |
| interacts with | <i>Weissella</i>                         | Pyrazine                            | 0.0416  | -0.8286     |
| interacts with | <i>norank_f_norank_o_Chloroplast</i>     | $\alpha$ -Caryophyllene             | 0.0416  | -0.8286     |

| interaction    | Microorganism                            | Flavor compounds                   | p_value | Correlation |
|----------------|------------------------------------------|------------------------------------|---------|-------------|
| interacts with | <i>Kosakonia</i>                         | 2-Methyl-pyrazine                  | 0.0416  | -0.8286     |
| interacts with | <i>Acinetobacter</i>                     | (E)-3-Penten-2-one                 | 0.0416  | -0.8286     |
| interacts with | <i>Acinetobacter</i>                     | Benzaldehyde                       | 0.0416  | -0.8286     |
| interacts with | <i>Acinetobacter</i>                     | 2-Methyl-pyrazine                  | 0.0416  | -0.8286     |
| interacts with | <i>Millerozyma</i>                       | (-)- $\alpha$ -Thujone             | 0.0401  | -0.8317     |
| interacts with | <i>Acetobacter</i>                       | (-)- $\alpha$ -Thujone             | 0.0401  | -0.8317     |
| interacts with | <i>Rhodococcus</i>                       | 6-Methyl-3,5-heptadiene-2-one      | 0.0361  | -0.8407     |
| interacts with | <i>Pseudomonas</i>                       | 6-Methyl-3,5-heptadiene-2-one      | 0.0361  | -0.8407     |
| interacts with | <i>unclassified_f_Enterobacteriaceae</i> | 2-Ethyl-pyrazine                   | 0.0361  | -0.8407     |
| interacts with | <i>Kozakia</i>                           | Benzyl alcohol                     | 0.0341  | -0.8452     |
| interacts with | <i>Millerozyma</i>                       | 2-Nonanone                         | 0.0244  | -0.8697     |
| interacts with | <i>unclassified_o_Saccharomycetales</i>  | Heptanoic acid ethyl ester         | 0.0244  | -0.8697     |
| interacts with | <i>unclassified_o_Saccharomycetales</i>  | Heptanoic acid                     | 0.0244  | -0.8697     |
| interacts with | <i>Acetobacter</i>                       | Dihydro-5-propyl-2(3H)-furanone    | 0.0244  | -0.8697     |
| interacts with | <i>Rhizopus</i>                          | 2-Pentyl-furan                     | 0.0206  | -0.8804     |
| interacts with | <i>Rhizopus</i>                          | 2-Pentyl-pyridine                  | 0.0206  | -0.8804     |
| interacts with | <i>unclassified_k_norank_d_Bacteria</i>  | (-)- $\alpha$ -Thujone             | 0.0206  | -0.8804     |
| interacts with | <i>Leuconostoc</i>                       | 3-Nonanone                         | 0.0206  | -0.8804     |
| interacts with | <i>Leuconostoc</i>                       | Isophorone                         | 0.0206  | -0.8804     |
| interacts with | <i>Leuconostoc</i>                       | 3-Methyl-phenol                    | 0.0206  | -0.8804     |
| interacts with | <i>Clavispora</i>                        | (E)-2-Decenal                      | 0.0198  | -0.8827     |
| interacts with | <i>unclassified_f_Metschnikowiaceae</i>  | (E)-2-Decenal                      | 0.0198  | -0.8827     |
| interacts with | <i>Leuconostoc</i>                       | 1-Dodecanol                        | 0.0198  | -0.8827     |
| interacts with | <i>Lactococcus</i>                       | Decyl aldehyde                     | 0.0198  | -0.8827     |
| interacts with | <i>Wickerhamomyces</i>                   | (E)-2-Methyl-2-butenal             | 0.0188  | -0.8857     |
| interacts with | <i>Rhizopus</i>                          | Butanoic acid ethyl ester          | 0.0188  | -0.8857     |
| interacts with | <i>Rhizopus</i>                          | 3-Methyl-butanoic acid ethyl ester | 0.0188  | -0.8857     |
| interacts with | <i>Rhizopus</i>                          | $\beta$ -Caryophyllene             | 0.0188  | -0.8857     |

| interaction    | Microorganism                           | Flavor compounds                | p_value | Correlation |
|----------------|-----------------------------------------|---------------------------------|---------|-------------|
| interacts with | <i>Candida</i>                          | Dihydro-5-propyl-2(3H)-furanone | 0.0188  | -0.8857     |
| interacts with | <i>Apiotrichum</i>                      | Octanoic acid                   | 0.0188  | -0.8857     |
| interacts with | <i>Issatchenkia</i>                     | Dihydro-5-propyl-2(3H)-furanone | 0.0188  | -0.8857     |
| interacts with | <i>Kodamaea</i>                         | Dihydro-5-propyl-2(3H)-furanone | 0.0188  | -0.8857     |
| interacts with | <i>Geotrichum</i>                       | Nonanoic acid ethyl ester       | 0.0188  | -0.8857     |
| interacts with | <i>unclassified_f_Dipodascaceae</i>     | Benzyl alcohol                  | 0.0188  | -0.8857     |
| interacts with | <i>Weissella</i>                        | $\beta$ -Caryophyllene          | 0.0188  | -0.8857     |
| interacts with | <i>Wickerhamomyces</i>                  | Butanedioic acid diethyl ester  | 0.0149  | -0.8986     |
| interacts with | <i>Rhizopus</i>                         | Acetic acid 2-phenylethyl ester | 0.0149  | -0.8986     |
| interacts with | <i>Weissella</i>                        | 2-Methyl-naphthalene            | 0.0149  | -0.8986     |
| interacts with | <i>Staphylococcus</i>                   | 2-Methyl-pentanoic acid         | 0.0149  | -0.8986     |
| interacts with | <i>Millerozyma</i>                      | Decyl aldehyde                  | 0.0081  | -0.9255     |
| interacts with | <i>Wickerhamomyces</i>                  | 2-Methyl-naphthalene            | 0.0077  | -0.9276     |
| interacts with | <i>Pediococcus</i>                      | 1-(1H-Pyrrol-2-yl)-ethanone     | 0.0077  | -0.9276     |
| interacts with | <i>unclassified_k_norank_d_Bacteria</i> | 6-Methyl-3,5-heptadiene-2-one   | 0.0077  | -0.9276     |
| interacts with | <i>Acetobacter</i>                      | Nonanoic acid ethyl ester       | 0.0077  | -0.9276     |
| interacts with | <i>Acetobacter</i>                      | Dihydro-5-pentyl-2(3H)-furanone | 0.0077  | -0.9276     |
| interacts with | <i>Wickerhamomyces</i>                  | Naphthalene                     | 0.0048  | -0.9429     |
| interacts with | <i>Wickerhamomyces</i>                  | 1-Methyl-naphthalene            | 0.0048  | -0.9429     |
| interacts with | <i>Candida</i>                          | Nonanoic acid ethyl ester       | 0.0048  | -0.9429     |
| interacts with | <i>Candida</i>                          | Dihydro-5-pentyl-2(3H)-furanone | 0.0048  | -0.9429     |
| interacts with | <i>Issatchenkia</i>                     | Nonanoic acid ethyl ester       | 0.0048  | -0.9429     |
| interacts with | <i>Issatchenkia</i>                     | Dihydro-5-pentyl-2(3H)-furanone | 0.0048  | -0.9429     |
| interacts with | <i>Kodamaea</i>                         | Nonanoic acid ethyl ester       | 0.0048  | -0.9429     |
| interacts with | <i>Kodamaea</i>                         | Dihydro-5-pentyl-2(3H)-furanone | 0.0048  | -0.9429     |
| interacts with | <i>unclassified_f_Dipodascaceae</i>     | Nonanoic acid ethyl ester       | 0.0048  | -0.9429     |
| interacts with | <i>unclassified_f_Dipodascaceae</i>     | Octanoic acid                   | 0.0048  | -0.9429     |
| interacts with | <i>Weissella</i>                        | Naphthalene                     | 0.0048  | -0.9429     |

| interaction    | Microorganism                            | Flavor compounds                | p_value  | Correlation |
|----------------|------------------------------------------|---------------------------------|----------|-------------|
| interacts with | <i>Lactococcus</i>                       | 2-Nonanone                      | 0.0048   | -0.9429     |
| interacts with | <i>Kosakonia</i>                         | Pyrazine                        | 0.0048   | -0.9429     |
| interacts with | <i>Acinetobacter</i>                     | 2,5-Dimethyl-pyrazine           | 0.0048   | -0.9429     |
| interacts with | <i>Leuconostoc</i>                       | 2-Tridecanone                   | 0.0012   | -0.971      |
| interacts with | <i>Millerozyma</i>                       | Dihydro-5-pentyl-2(3H)-furanone | 3.00E-04 | -0.9856     |
| interacts with | <i>unclassified_o__Saccharomycetales</i> | Octanoic acid ethyl ester       | 3.00E-04 | -0.9856     |
| interacts with | <i>Acinetobacter</i>                     | 2-Ethyl-pyrazine                | 3.00E-04 | -0.9856     |
| interacts with | <i>Weissella</i>                         | (E)-2-Methyl-2-butenal          | 0        | -1          |
